# Supplementary material for: Synthesis and antimycotic activity of new derivatives of imidazo[1,2-a]pyrimidines
Source: publisher site journal article supplement (doi:10.3762/bjoc.20.236), 2024-11-05

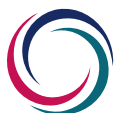

## Supporting Information

for

### **Synthesis and antimycotic activity of new derivatives of imidazo[1,2-a]pyrimidines**

Dmitriy Yu. Vandyshev, Daria A. Mangusheva, Khidmet S. Shikhaliev, Kirill A. Scherbakov, Oleg N. Burov, Alexander D. Zagrebaev, Tatiana N. Khmelevskaya, Alexey S. Trenin and Fedor I. Zubkov

*Beilstein J. Org. Chem.* **2024**, *20*, 2806–2817. [doi:10.3762/bjoc.20.236](https://doi.org/10.3762/bjoc.20.236)

**General reaction procedures, compound characterization data, copies of NMR and mass spectra for all new products**

## Table of contents

|    |                                        |     |
|----|----------------------------------------|-----|
| 1. | General information .....              | S2  |
| 2. | Analytical data of products .....      | S4  |
| 3. | NMR and mass spectra of products ..... | S13 |

## 1. General information

The purity of the synthesized compounds was monitored by TLC on silica gel 60 F<sub>254</sub> plates (Merck) using chloroform, ethyl acetate, methanol or mixtures thereof as eluents. Chromatograms were developed by UV irradiation (254 and 365 nm), by treatment with iodine vapor or by heating the plate. Melting temperatures were determined using a Stuart SMP 30.

<sup>1</sup>H, <sup>13</sup>C and <sup>19</sup>F NMR spectra were recorded on JNM-ECA 600 or Bruker Avance Neo 700 spectrometers (on 600 and 700 MHz for <sup>1</sup>H; 151 and 176 MHz for <sup>13</sup>C; 564 and 659 MHz for <sup>19</sup>F) using residual solvent signals (7.26/77.0 ppm for <sup>1</sup>H/<sup>13</sup>C CDCl<sub>3</sub> and 2.50/39.5 ppm for DMSO-*d*<sub>6</sub>). CFC<sub>3</sub> was used as an internal standard for <sup>19</sup>F NMR [1]. Where necessary, assignments of <sup>1</sup>H and <sup>13</sup>C signals were made with the aid of COSY, NOESY, HSQC and HMBC 2D NMR spectra.

HPLC analysis was performed on an Agilent 1260 Infinity liquid chromatograph equipped with a UV detector coupled to an Agilent 6230 TOF LC/MS detector (electrospray ionization, capillary voltage 4 kV, fragment voltage 191 V, skimmer voltage 65 V, positive ion detection, Poroshell 120 EC-C18 column, 4.6 m × 150 mm, particle size 2.7 μm, mobile phase - H<sub>2</sub>O (40–0%), MeCN (60–100%), linear gradient elution 5 min, flow rate 0.4 mL/min, column temperature 40 °C, sample volume 1.5 μL.

Quantum chemical calculations were performed on molecules in the gas phase using density functional theory with the 6-31G\*\* basis set and the B3LYP functional including the three-parameter Beck exchange functional and the Lee-Yan-Parr correlation functional [2].

The structure of *A. fumigatus* CYP51 (PDB ID: 4UYM [3]) in complex with the antifungal drug voriconazole was used as a target for molecular docking. Compounds **4a–e** and **5a–e** were generated as *R*- and *S*-isomers in the molecular editor package SYBYL and

minimized using Gasteiger-Hückel charges. Docking was performed into the pre-minimized structure of CYP51 with non-protein atoms removed except for haem. Vina Autodock software was used for docking.

The docking poses obtained were selected based on the position of the heterocyclic nitrogen atom relative to the haem iron atom. Those compounds that showed a hypothetical possibility of forming a coordination bond with the haem iron were marked as potentially active.

The interaction fingerprints (IFP) between voriconazole and selected compounds with protein were calculated using the Python library ProLif [4]. In view of the inability of docking to account for coordination bonds due to the required significant overlap of van der Waals radii of atoms, the distance cut-off for the formation of the 'metal-acceptor' interaction type was increased from the ProLif default of 2.8 Å to 3.5 Å. To assess the similarity of chemical structures between voriconazole and selected compounds, Tanimoto coefficients were calculated based on MACCS descriptors (Tanimoto MACCS). To assess the similarity of ligand-protein interactions, Tanimoto coefficients were also calculated for interaction fingerprints (Tanimoto IFP). Tanimoto coefficients were calculated using the RDKit library.

## References

1. Rosenau, C.P.; Jelier, B.J.; Gossert, A.D.; Togni, A. *Angew. Chem. Int. Ed.* **2018**, *57*, 9528–9533. <https://doi.org/10.1002/anie.201802620>
2. Becke, A.D. *Phys. Rev. A. Gen. Phys.* **1988**, *38*, 3098–3100. <https://doi.org/10.1103/physreva.38.3098>.
3. Hargrove, T.Y.; Wawrzak, Z.; Lamb, D.C.; Guengerich, F.P.; Lipesheva, G.I. *J. Biol. Chem.* **2015**, *290*, 23916–23934. <https://doi.org/10.1074/jbc.M115.677310>.
4. Bouysset, C.; Fiorucci, S. *J. Cheminform.* **2021**, *13*, 72. <https://doi.org/10.1186/s13321-021-00548-6>

## 2. Analytical data of products

*7-Oxo-N-phenyl-5,6,7,8-tetrahydroimidazo[1,2-a]pyrimidine-5-carboxamide (4a).*

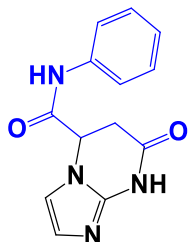

Yield 89%. White powdery compound. M.p. 253–255 °C.  $^1\text{H}$  NMR (700 MHz, DMSO- $d_6$ )  $\delta$ , ppm: 11.03 (1H, br.s, H-8), 10.42 (1H, s, CONHAr), 7.55 (2H, d,  $^3J = 8.0$  Hz, H<sub>Ar</sub>), 7.33 (2H, t,  $^3J = 7.7$  Hz, H<sub>Ar</sub>), 7.10 (1H, t,  $^3J = 7.4$  Hz, H<sub>Ar</sub>), 6.96 (1H, d,  $^3J = 1.6$  Hz, H-3), 6.67 (1H, d,  $^3J = 1.6$  Hz, H-2), 5.06 (1H, dd,  $^3J_{5,6A} = 2.8$ ,  $^3J_{5,6B} = 7.5$  Hz, H-5), 3.25 (1H, dd,  $^2J_{6A,6B} = 16.6$ ,  $^3J_{5,6B} = 7.5$  Hz, H<sub>B</sub>-6), 2.75 (1H, dd,  $^2J_{6A,6B} = 16.6$ ,  $^3J_{5,6A} = 2.8$  Hz, H<sub>A</sub>-6).  $^{13}\text{C}$  NMR (176 MHz, DMSO- $d_6$ )  $\delta$ , ppm: 167.6 (CONHAr), 166.7 (C-7), 143.3 (C-8a), 138.8 (C-1'), 129.4 (2C, C-3' and C-5'), 126.1 (C-2), 124.4 (C-4'), 119.8 (2C, C-2' and C-6'), 115.6 (C-3), 54.3 (C-5), 34.3 (C-6) ppm. HRMS (ESI) calculated for C<sub>13</sub>H<sub>12</sub>N<sub>4</sub>O<sub>2</sub> [M + H]<sup>+</sup>: 257.1034, found 257.1031.

*N-(4-Isopropylphenyl)-7-oxo-5,6,7,8-tetrahydroimidazo[1,2-a]pyrimidine-5-carboxamide (4b).*

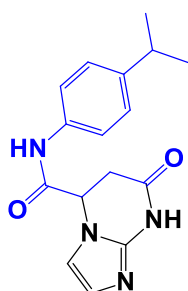

Yield 84%. White powdery compound. M.p. 271–273 °C.  $^1\text{H}$  NMR (700 MHz, DMSO- $d_6$ )  $\delta$ , ppm: 11.02 (1H, br.s, H-8), 10.35 (1H, s, CONHAr), 7.48 (2H, dd,  $^4J = 2.4$ ,  $^3J = 8.0$  Hz, H<sub>Ar</sub>), 7.19 (1H, dd,  $^4J = 2.4$ ,  $^3J = 7.8$  Hz, H<sub>Ar</sub>), 6.95 (1H, d,  $^3J = 1.5$  Hz, H-3), 6.67 (1H, d,  $^3J = 1.5$  Hz, H-2), 5.04 (1H, dd,  $^3J_{5,6A} = 2.8$ ,  $^3J_{5,6B} = 7.5$  Hz, H-5), 3.23 (1H, dd,  $^2J_{6A,6B} = 16.6$ ,  $^3J_{5,6B} = 7.5$  Hz, H<sub>B</sub>-6), 2.84 (1H, hept,  $^3J = 6.9$  Hz, CH-*i*Pr), 2.73 (1H, dd,  $^2J_{6A,6B} = 16.6$ ,  $^3J_{5,6A} = 2.8$  Hz, H<sub>A</sub>-6), 1.17 (6H, d,  $^3J = 6.9$  Hz, CH<sub>3</sub>).  $^{13}\text{C}$  NMR (176 MHz, DMSO- $d_6$ )  $\delta$ , ppm: 167.3 (CONHAr), 166.7 (C-7), 144.6 (C-1'), 143.3 (C-8a), 136.5 (C-4'), 127.1 (2C, C-3' and C-

5'), 126.1 (C-2), 119.9 (2C, C-2' and C-6'), 115.5 (C-3), 54.3 (C-5), 34.4 (C-6), 33.3 (CH-Pr), 24.38 (CH<sub>3</sub>) ppm. HRMS (ESI) calculated for C<sub>16</sub>H<sub>18</sub>N<sub>4</sub>O<sub>2</sub> [M + H]<sup>+</sup>: 299.1503, found 299.1503.

*N*-(3-Chloro-2-methylphenyl)-7-oxo-5,6,7,8-tetrahydroimidazo[1,2-*a*]pyrimidine-5-carboxamide (**4c**).

Yield 86%. White powdery compound. M.p. 278–280 °C. <sup>1</sup>H NMR (700 MHz, DMSO-*d*<sub>6</sub>) δ, ppm: 11.03 (1H, br.s, H-8), 10.05 (1H, s, CONHAr), 7.33 (1H, dd, <sup>3</sup>*J* = 8.0, <sup>4</sup>*J* = 1.3 Hz, H<sub>Ar</sub>), 7.30 (1H, dd, <sup>3</sup>*J* = 8.0, <sup>4</sup>*J* = 1.3

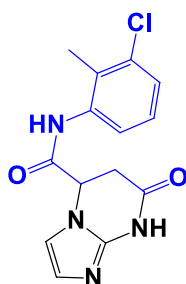

Hz, H<sub>Ar</sub>), 7.22 (1H, t, <sup>3</sup>*J* = 8.0 Hz, H<sub>Ar</sub>), 6.99 (1H, d, <sup>3</sup>*J* = 1.6 Hz, H-3), 6.69 (1H, d, <sup>3</sup>*J* = 1.6 Hz, H-2), 5.16 (1H, dd, <sup>3</sup>*J*<sub>5,6A</sub> = 2.8, <sup>3</sup>*J*<sub>5,6B</sub> = 7.5 Hz, H-5), 3.27 (1H, dd, <sup>2</sup>*J*<sub>6A,6B</sub> = 16.6, <sup>3</sup>*J*<sub>5,6B</sub> = 7.5 Hz, H<sub>B</sub>-6), 2.79 (1H, dd, <sup>2</sup>*J*<sub>6A,6B</sub> = 16.6, <sup>3</sup>*J*<sub>5,6A</sub> = 2.8 Hz, H<sub>A</sub>-6), 2.19 (6H, s, CH<sub>3</sub>). <sup>13</sup>C NMR (176

MHz, DMSO-*d*<sub>6</sub>) δ, ppm: 168.0 (CONHAr), 166.7 (C-7), 143.3 (C-8a), 137.3 (C-1'), 134.3 (C-3'), 131.1 (C-5'), 127.5 (C-4'), 127.2 (C-2'), 126.2 (C-2), 125.0 (C-6'), 115.5 (C-3), 54.8 (C-5), 34.4 (C-6), 15.4 (CH<sub>3</sub>) ppm.

HRMS (ESI) calculated for C<sub>14</sub>H<sub>13</sub>ClN<sub>4</sub>O<sub>2</sub> [M + H]<sup>+</sup>: 305.0800, found 305.0800.

*N*-(2,5-Dichlorophenyl)-7-oxo-5,6,7,8-tetrahydroimidazo[1,2-*a*]pyrimidine-5-carboxamide (**4d**).

Yield 83%. White powdery compound. M.p. 248–250 °C. <sup>1</sup>H NMR (700 MHz, DMSO-*d*<sub>6</sub>) δ, ppm: 10.98 (1H, br.s, H-8), 10.09 (1H, s, CONHAr), 7.73 (1H, d, <sup>4</sup>*J* = 2.4 Hz, H<sub>Ar</sub>), 7.49 (1H, d, <sup>3</sup>*J* = 8.6 Hz, H<sub>Ar</sub>), 7.23 (1H,

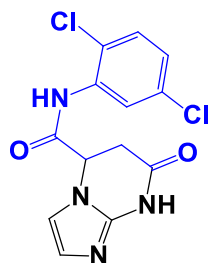

dd, <sup>4</sup>*J* = 2.4, <sup>3</sup>*J* = 8.6 Hz, H<sub>Ar</sub>), 6.90 (1H, d, <sup>3</sup>*J* = 1.1 Hz, H-3), 6.60 (1H, d, <sup>3</sup>*J* = 1.1 Hz, H-2), 5.19 (1H, dd, <sup>3</sup>*J*<sub>5,6A</sub> = 2.6, <sup>3</sup>*J*<sub>5,6B</sub> = 7.5 Hz, H-5), 3.17 (1H, dd, <sup>2</sup>*J*<sub>6A,6B</sub> = 16.6, <sup>3</sup>*J*<sub>5,6B</sub> = 7.5 Hz, H<sub>B</sub>-6), 2.72 (1H, dd, <sup>2</sup>*J*<sub>6A,6B</sub> = 16.6, <sup>3</sup>*J*<sub>5,6A</sub> = 2.8 Hz, H<sub>A</sub>-6). <sup>13</sup>C NMR (176 MHz, DMSO-*d*<sub>6</sub>) δ, ppm:

168.5 (CONHAr), 166.6 (C-7), 143.3 (C-8a), 135.7 (C-1'), 132.1 (C-5'), 131.5 (C-3'), 127.1 (C-4'), 126.2 (C-2), 125.7 (C-6'), 125.6 (C-2'), 115.6 (C-3), 53.7 (C-5), 34.3 (C-6) ppm. HRMS (ESI) calculated for  $C_{13}H_{10}Cl_2N_4O_2$   $[M + H]^+$ : 325.0254, found 325.0254.

*N*-(2-Methyl-5-nitrophenyl)-7-oxo-5,6,7,8-tetrahydroimidazo[1,2-*a*]pyrimidine-5-carboxamide (**4e**).

Yield 82%. Pale yellow powdery compound. M.p. 275–277°C.  $^1H$  NMR (700 MHz, DMSO- $d_6$ )  $\delta$ , ppm: 11.09 (1H, br.s, H-8), 10.08 (1H, s, CONHAr), 8.40 (1H, d,  $^4J = 2.5$  Hz, H<sub>Ar</sub>), 7.98 (1H, dd,  $^3J = 8.5$ ,  $^4J = 2.6$  Hz, H<sub>Ar</sub>), 7.53 (1H, d,  $^3J = 8.5$  Hz, H<sub>Ar</sub>), 7.01 (1H, d,  $^3J = 1.5$  Hz, H-3), 6.70 (1H, d,  $^3J = 1.5$  Hz, H-2), 5.25 (1H, dd,  $^3J_{5,6A} = 2.8$ ,  $^3J_{5,6B} = 7.5$  Hz, H-5), 3.30 (1H, dd,  $^2J_{6A,6B} = 16.6$ ,  $^3J_{5,6B} = 7.5$  Hz, H<sub>B</sub>-6), 2.84 (1H, dd,  $^2J_{6A,6B} = 16.6$ ,  $^3J_{5,6A} = 2.6$  Hz, H<sub>A</sub>-6), 2.35 (3H, s, CH<sub>3</sub>).

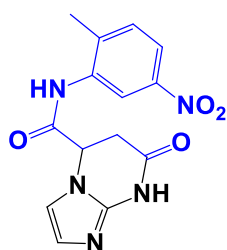

$^{13}C$  NMR (176 MHz, DMSO- $d_6$ )  $\delta$ , ppm: 168.5 (CONHAr), 166.7 (C-7), 146.1 (C-5'), 143.3 (C-8a), 140.0 (C-1'), 136.8 (C-2'), 132.1 (C-3'), 126.2 (C-2), 120.5 (C-4'), 119.1 (C-6'), 115.6 (C-3), 53.9 (C-5), 34.3 (C-6), 18.5 (CH<sub>3</sub>) ppm. HRMS (ESI) calculated for  $C_{14}H_{13}N_5O_4$   $[M + H]^+$ : 316.1041, found 316.1041.

*N*-Benzyl-7-oxo-5,6,7,8-tetrahydroimidazo[1,2-*a*]pyrimidine-5-carboxamide (**4f**).

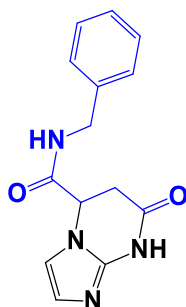

Yield 84%. Pale pink powdery compound. M.p. 237–239 °C.  $^1H$  NMR (700 MHz, DMSO- $d_6$ )  $\delta$ , ppm: 10.99 (1H, s, H-8), 8.82 (1H, t,  $^3J = 5.8$  Hz, CONHAr), 7.33 (2H, t,  $^3J = 7.6$  Hz, H<sub>Ar</sub>), 7.28–7.22 (3H, m, H<sub>Ar</sub>), 6.88 (1H, d,  $^3J = 1.5$  Hz, H-3), 6.66 (1H, d,  $^3J = 1.5$  Hz, H-2), 4.93 (1H, dd,  $^3J_{5,6A} = 2.9$ ,  $^3J_{5,6B} = 7.4$  Hz, H-5), 4.30 (2H, d,  $^3J = 5.6$  Hz, H-1'), 3.14 (1H, dd,  $^2J_{6A,6B} = 16.5$ ,  $^3J_{5,6B} = 7.4$  Hz, H<sub>B</sub>-6), 2.66 (1H, dd,  $^2J_{6A,6B} =$

16.5,  $^3J_{5,6A} = 2.9$  Hz, H<sub>A</sub>-6).  $^{13}\text{C}$  NMR (176 MHz, DMSO-*d*<sub>6</sub>)  $\delta$ , ppm: 168.9 (CONHalk), 166.8 (C-7), 143.2 (C-8a), 139.1 (C-1''), 128.9 (2C, C-3'' and C-5''), 127.7 (2C, C-2'' and C-6''), 127.5 (C-4''), 126.0 (C-2), 115.4 (C-3), 53.6 (C-5), 42.8 (C-1'), 34.3 (C-6). HRMS (ESI) calculated for C<sub>14</sub>H<sub>14</sub>N<sub>4</sub>O<sub>2</sub> [M + H]<sup>+</sup>: 271.1190, found 271.1191.

*7-Oxo-N-phenethyl-5,6,7,8-tetrahydroimidazo[1,2-a]pyrimidine-5-carboxamide (4g).*

Yield 75%. Pale pink powdery compound. M.p. 232–234 °C.  $^1\text{H}$  NMR (700 MHz, DMSO-*d*<sub>6</sub>)  $\delta$ , ppm: 10.96 (1H, s, H-8), 8.38 (1H, t,  $^3J = 5.6$  Hz, CONHalk), 7.30 (2H, t,  $^3J = 7.6$  Hz, H<sub>Ar</sub>), 7.24–7.14 (3H, m, H<sub>Ar</sub>), 6.75 (1H, d,  $^3J = 1.6$  Hz, H-3), 6.64 (1H, d,  $^3J = 1.6$  Hz, H-2), 4.80 (1H, dd,  $^3J_{5,6A} = 3.3$ ,  $^3J_{5,6B} = 7.4$  Hz, H-5), 3.39–3.23 (2H, m, H-2'), 3.05 (1H, dd,  $^2J_{6A,6B} = 16.5$ ,  $^3J_{5,6B} = 7.4$  Hz, H<sub>B</sub>-6), 2.71 (2H, t,  $^3J = 7.2$  Hz, H-1'), 2.56 (1H, dd,  $^2J_{6A,6B} = 16.5$ ,  $^3J_{5,6A} = 3.3$  Hz, H<sub>A</sub>-6).  $^{13}\text{C}$  NMR (176 MHz, DMSO-*d*<sub>6</sub>)  $\delta$ , ppm: 168.7 (CONHalk), 166.8 (C-7), 143.1 (C-8a), 139.6 (C-1''), 129.2 (2C, C-3'' and C-5''), 128.8 (2C, C-2'' and C-6''), 126.7 (C-4''), 125.9 (C-2), 115.3 (C-3), 53.5 (C-5), 40.8 (C-1'), 35.2 (C-2'), 34.3 (C-6). HRMS (ESI) calculated for C<sub>15</sub>H<sub>16</sub>N<sub>4</sub>O<sub>2</sub> [M + H]<sup>+</sup>: 285.1347, found 285.1344.

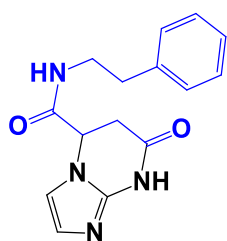

*N-(4-Methoxyphenethyl)-7-oxo-5,6,7,8-tetrahydroimidazo[1,2-a]pyrimidine-5-carboxamide (4h).*

Yield 89%. Pale pink powdery compound. M.p. 249–251 °C.  $^1\text{H}$  NMR (700 MHz, DMSO-*d*<sub>6</sub>)  $\delta$ , ppm: 10.95 (1H, s, H-8), 8.34 (1H, t,  $^3J = 5.7$  Hz, CONHalk), 7.11 – 7.09 (2H, m, H<sub>Ar</sub>), 6.87–6.84 (2H, m, H<sub>Ar</sub>), 6.75 (1H, d,  $^3J = 1.5$  Hz, H-3), 6.64 (1H, d,  $^3J = 1.5$  Hz, H-2), 4.80 (1H, dd,  $^3J_{5,6A} = 3.2$ ,  $^3J_{5,6B} = 7.4$  Hz, H-5), 3.73 (3H, s, OCH<sub>3</sub>), 3.30–3.21 (2H, m,

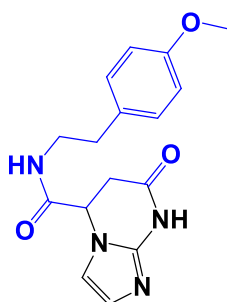



H-2'), 3.06 (1H, dd,  $^2J_{6A,6B} = 16.5$ ,  $^3J_{5,6B} = 7.4$  Hz, H<sub>B</sub>-6), 2.64 (2H, t,  $^3J = 7.1$  Hz, H-1'), 2.56 (1H, dd,  $^2J_{6A,6B} = 16.5$ ,  $^3J_{5,6A} = 3.2$  Hz, H<sub>A</sub>-6).  $^{13}\text{C}$  NMR (176 MHz, DMSO-*d*<sub>6</sub>)  $\delta$ , ppm: 168.6 (CONHAlk), 166.8 (C-7), 158.2 (C-4''), 143.1 (C-8a), 131.4 (C-1''), 130.1 (2C, C-2'' and C-6''), 125.9 (C-2), 115.4 (C-3), 114.3 (2C, C-3'' and C-5''), 55.5 (CH<sub>3</sub>), 53.5 (C-5), 41.0 (C-1'), 34.4 (C-2''), 34.3 (C-6). HRMS (ESI) calculated for C<sub>16</sub>H<sub>18</sub>N<sub>4</sub>O<sub>3</sub> [M + H]<sup>+</sup>: 315.1453, found 315.1451.

*N*-Methyl-7-oxo-5,6,7,8-tetrahydroimidazo[1,2-*a*]pyrimidine-5-carboxamide (**4i**).

Yield 70%. Pale pink powdery compound. M.p. 218–220 °C.  $^1\text{H}$  NMR (700 MHz, DMSO-*d*<sub>6</sub>)  $\delta$ , ppm: 10.95 (1H, s, H-8), 8.41 (1H, t,  $^3J = 4.6$  Hz, CONHAlk), 6.82 (1H, d,  $^3J = 1.6$  Hz, H-3), 6.62 (1H, d,  $^3J = 1.6$  Hz, H-2), 4.85 (1H, dd,  $^3J_{5,6A} = 3.1$ ,  $^3J_{5,6B} = 7.4$  Hz, H-5), 3.04 (1H, dd,  $^2J_{6A,6B} = 16.8$ ,  $^3J_{5,6B} = 7.8$  Hz, H<sub>B</sub>-6), 2.63–2.55 (4H, m, CH<sub>3</sub> and H<sub>A</sub>-6).  $^{13}\text{C}$  NMR (176 MHz, DMSO-*d*<sub>6</sub>)  $\delta$ , ppm: 169.3 (CONHCH<sub>3</sub>), 167.1 (C-7), 143.5 (C-8a), 125.9 (C-2), 115.3 (C-3), 53.5 (C-5), 34.3 (C-6), 26.1 (CH<sub>3</sub>). HRMS (ESI) calculated for C<sub>8</sub>H<sub>10</sub>N<sub>4</sub>O<sub>2</sub> [M + H]<sup>+</sup>: 195.0877, found 195.0878.

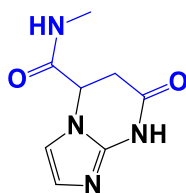

*N*-Phenyl-2-(7-oxo-5,6,7,8-tetrahydroimidazo[1,2-*a*]pyrimidin-6-yl)acetamide (**5a**).

Yield 92%. White powdery compound. M.p. 242–244 °C.  $^1\text{H}$  NMR (700 MHz, DMSO-*d*<sub>6</sub>)  $\delta$ , ppm: 11.09 (1H, br.s, H-8), 10.07 (1H, s, CONHAr), 7.59 (2H, d,  $^3J = 7.6$  Hz, H<sub>Ar</sub>), 7.30 (2H, t,  $^3J = 7.7$  Hz, H<sub>Ar</sub>), 7.04 (1H, t,  $^3J = 7.4$  Hz, H<sub>Ar</sub>), 6.91 (1H, d,  $^3J = 1.4$  Hz, H-3), 6.65 (1H, d,  $^3J = 1.2$  Hz, H-2), 4.28 (1H, dd,  $^3J_{5A,6} = 6.9$ ,  $^2J_{5A,5B} = 12.4$  Hz, H<sub>A</sub>-5), 3.92 (1H, t,  $^3J_{5B,6} = ^2J_{5A,5B} = 12.3$  Hz, H<sub>B</sub>-5), 3.19–3.26 (1H, m, H-6), 2.91 (1H, dd,

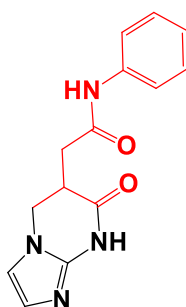

$^2J_{2'A,2'B} = 16.2$ ,  $^3J_{2'A,6} = 4.5$  Hz,  $H_{A-2'}$ ), 2.55 (1H, dd,  $^2J_{2'A,2'B} = 16.2$ ,  $^3J_{2'B,6} = 7.9$  Hz,  $H_{B-2'}$ ).  $^{13}C$  NMR (176 MHz, DMSO- $d_6$ )  $\delta$ , ppm: 169.5 (CONHAr), 169.4 (C-7), 142.6 (C-8a), 139.6 (C-1'), 129.1 (2C, C-3' and C-5'), 125.5 (C-2), 123.6 (C-4'), 119.5 (2C, C-2' and C-6'), 116.0 (C-3), 44.1 (C-5), 37.0 (C-6), 34.5 (C-2'') ppm. HRMS (ESI) calculated for  $C_{14}H_{14}N_4O_2$   $[M + H]^+$ : 271.1190, found 271.1191.

*N*-(4-Bromophenyl)-2-(7-oxo-5,6,7,8-tetrahydroimidazo[1,2-*a*]pyrimidin-6-yl)acetamide (**5b**).

Yield 86%. Pale yellow powdery compound. M.p. 263–265 °C.  $^1H$  NMR (700 MHz, DMSO- $d_6$ )  $\delta$ , ppm: 11.07 (1H, br.s, H-8), 10.21 (1H, s, CONHAr), 7.57 (2H, dd,  $^3J = 8.9$ ,  $^4J = 0.8$ ,  $H_{Ar}$ ), 7.48 (2H, dd,  $^3J = 8.9$ ,  $^4J = 1.1$ ,  $H_{Ar}$ ), 6.90 (1H, d,  $^3J = 1.5$  Hz, H-3), 6.65 (1H, d,  $^3J = 1.5$  Hz, H-2), 4.28 (1H, dd,  $^3J_{5A,6} = 7.6$ ,  $^2J_{5A,5B} = 12.5$  Hz,  $H_{A-5}$ ), 3.92 (1H, t,  $^3J_{5B,6} = ^2J_{5A,5B} = 12.1$  Hz,  $H_{B-5}$ ), 3.19–3.25 (1H, m, H-6), 2.91 (1H, dd,  $^2J_{2'A,2'B} = 16.1$ ,  $^3J_{2'A,6} = 4.8$  Hz,  $H_{A-2'}$ ), 2.55 (1H, dd,  $^2J_{2'A,2'B} = 16.1$ ,  $^3J_{2'B,6} = 7.7$  Hz,  $H_{B-2'}$ ).  $^{13}C$  NMR (176 MHz, DMSO- $d_6$ )  $\delta$ , ppm: 169.7 (CONHAr), 169.4 (C-7), 142.6 (C-8a), 139.0 (C-1'), 132.0 (2C, C-3' and C-5'), 125.5 (C-2), 121.4 (2C, C-2' and C-6'), 116.0 (C-3), 115.1 (C-4'), 44.0 (C-5), 37.9 (C-6), 34.5 (C-2'') ppm. HRMS (ESI) calculated for  $C_{14}H_{13}BrN_4O_2$   $[M + H]^+$ : 349.0295, found 349.0294.

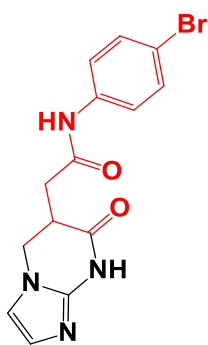

*N*-(4-Fluorophenyl)-2-(7-oxo-5,6,7,8-tetrahydroimidazo[1,2-*a*]pyrimidin-6-yl)acetamide (**5c**).

Yield 83%. White powdery compound. M.p. 238–240 °C.  $^1H$  NMR (700 MHz, DMSO- $d_6$ )  $\delta$ , ppm: 11.07 (1H, br.s, H-8), 10.13 (1H, s, CONHAr), 7.58–7.64 (2H, m,  $H_{Ar}$ ), 7.14 (2H, td,  $^3J = 9.0$ ,  $^4J = 2.1$ ,  $H_{Ar}$ ), 6.90 (1H, d,  $^3J = 1.5$  Hz, H-3), 6.65 (1H, d,  $^3J = 1.5$  Hz, H-2), 4.28 (1H, dd,  $^3J_{5A,6} =$

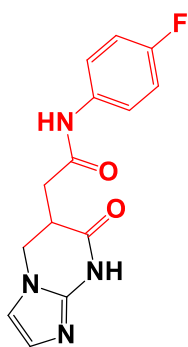

7.0,  $^2J_{5A,5B} = 12.4$  Hz, H<sub>A</sub>-5), 3.92 (1H, t,  $^3J_{5B,6} = ^2J_{5A,5B} = 12.1$  Hz, H<sub>B</sub>-5), 3.19–3.25 (1H, m, H-6), 2.91 (1H, dd,  $^2J_{2'A,2'B} = 16.0$ ,  $^3J_{2'A,6} = 4.7$  Hz, H<sub>A</sub>-2'), 2.55 (1H, dd,  $^2J_{2'A,2'B} = 16.1$ ,  $^3J_{2'B,6} = 7.8$  Hz, H<sub>B</sub>-2').  $^{13}\text{C}$  NMR (176 MHz, DMSO-*d*<sub>6</sub>)  $\delta$ , ppm: 169.5 (CONHAr), 169.3 (C-7), 159.0 and 157.7 (C-F), 142.6 (C-8a), 136.0 (C-1'), 125.5 (C-2), 121.2 (2C, C-2' and C-6'), 116.0 (C-3), 115.8 and 115.7 (C-3' and C-5'), 44.0 (C-5), 37.0 (C-6), 34.4 (C-2'') ppm.  $^{19}\text{F}$  NMR (659 MHz, DMSO-*d*<sub>6</sub>)  $\delta$ , ppm: -119.55. HRMS (ESI) calculated for C<sub>14</sub>H<sub>13</sub>FN<sub>4</sub>O<sub>2</sub> [M + H]<sup>+</sup>: 289.1096, found 289.1096.

*N*-(4-Chlorophenyl)-2-(7-oxo-5,6,7,8-tetrahydroimidazo[1,2-*a*]pyrimidin-6-yl)acetamide (**5d**).

Yield 87%. White powdery compound. M.p. 239–241 °C.  $^1\text{H}$  NMR (700 MHz, DMSO-*d*<sub>6</sub>)  $\delta$ , ppm: 11.09 (1H, br.s, H-8), 10.42 (1H, s, CONHAr), 7.64 (2H, dt,  $^3J = 8.8$ ,  $^4J = 3.1$  Hz, H<sub>Ar</sub>), 7.36 (2H, dt,  $^3J = 8.8$ ,  $^4J = 1.9$  Hz, H<sub>Ar</sub>), 6.90 (1H, d,  $^3J = 1.4$  Hz, H-3), 6.65 (1H, d,  $^3J = 1.4$  Hz, H-2), 4.27 (1H, dd,  $^3J_{5A,6} = 7.2$ ,  $^2J_{5A,5B} = 12.3$  Hz, H<sub>A</sub>-5), 3.91 (1H, t,  $^3J_{5B,6} = ^2J_{5A,5B} = 12.3$  Hz, H<sub>B</sub>-5), 3.19–3.25 (1H, m, H-6), 2.91 (1H, dd,  $^2J_{2'A,2'B} = 16.2$ ,  $^3J_{2'A,6} = 4.8$  Hz, H<sub>A</sub>-2'), 2.56 (1H, dd,  $^2J_{2'A,2'B} = 16.2$ ,  $^3J_{2'B,6} = 7.9$  Hz, H<sub>B</sub>-2').  $^{13}\text{C}$  NMR (176 MHz, DMSO-*d*<sub>6</sub>)  $\delta$ , ppm: 169.7 (CONHAr), 169.5 (C-7), 142.6 (C-8a), 138.6 (C-1'), 129.0 (2C, C-3' and C-5'), 127.0 (C-4'), 125.5 (C-2), 121.1 (2C, C-2' and C-6'), 116.0 (C-3), 44.0 (C-5), 37.0 (C-6), 34.5 (C-2'') ppm. HRMS (ESI) calculated for C<sub>14</sub>H<sub>13</sub>ClN<sub>4</sub>O<sub>2</sub> [M + H]<sup>+</sup>: 305.0800, found 305.0801.

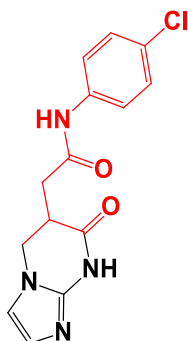

*N*-(4-Ethylphenyl)-2-(7-oxo-5,6,7,8-tetrahydroimidazo[1,2-*a*]pyrimidin-6-yl)acetamide (**5e**).

Yield 88%. White powdery compound. M.p. 215–217 °C. <sup>1</sup>H NMR (700 MHz, DMSO-*d*<sub>6</sub>) δ, ppm: 11.11 (1H, br.s, H-8), 10.09 (1H, s, CONHAr), 7.50 (2H, dd, <sup>4</sup>*J* = 1.2 Hz, <sup>3</sup>*J* = 8.6 Hz, H<sub>Ar</sub>), 7.12 (2H, dd, <sup>4</sup>*J* = 1.2 Hz, <sup>3</sup>*J* = 8.6 Hz, H<sub>Ar</sub>), 6.90 (1H, d, <sup>3</sup>*J* = 1.4 Hz, H-3), 6.65 (1H, d, <sup>3</sup>*J* = 1.1 Hz, H-2), 4.27 (1H, dd, <sup>3</sup>*J*<sub>5A,6</sub> = 6.9, <sup>2</sup>*J*<sub>5A,5B</sub> = 12.4 Hz, H<sub>A</sub>-5), 3.91 (1H, t, <sup>3</sup>*J*<sub>5B,6</sub> = <sup>2</sup>*J*<sub>5A,5B</sub> = 12.2 Hz, H<sub>B</sub>-5), 3.19–3.24 (1H, m, H-6), 2.91 (1H, dd, <sup>2</sup>*J*<sub>2'A,2'B</sub> = 16.0, <sup>3</sup>*J*<sub>2'A,6</sub> = 4.5 Hz, H<sub>A</sub>-2'), 2.52–2.57 (3H, m, H<sub>B</sub>-2' and CH<sub>2</sub>CH<sub>3</sub>), 1.15 (3H, t, <sup>3</sup>*J* = 7.6 Hz, CH<sub>2</sub>CH<sub>3</sub>). <sup>13</sup>C NMR (176 MHz, DMSO-*d*<sub>6</sub>) δ, ppm: 169.5 (CONHAr), 169.2 (C-7), 142.7 (C-8a), 138.9 (C-4'), 137.4 (C-1'), 128.3 (2C, C-3' and C-5'), 125.5 (C-2), 119.6 (2C, C-2' and C-6'), 116.0 (C-3), 44.1 (C-5), 37.0 (C-6), 34.4 (C-2''), 28.1 (CH<sub>2</sub>), 16.2 (CH<sub>3</sub>) ppm. HRMS (ESI) calculated for C<sub>16</sub>H<sub>18</sub>N<sub>4</sub>O<sub>2</sub> [M + H]<sup>+</sup>: 299.1507, found 299.1509.

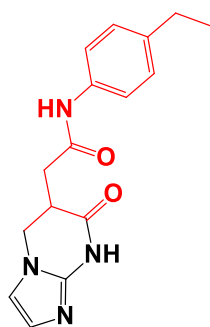

### 3. NMR and mass spectra of products

#### User Chromatograms

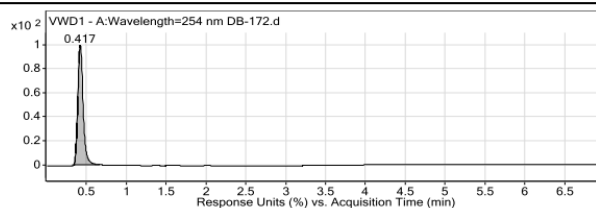

#### Integration Peak List

| Peak | Start | RT    | End  | Height | Area    | Area % |
|------|-------|-------|------|--------|---------|--------|
| 1    | 0.32  | 0.417 | 0.66 | 758.87 | 3600.09 | 100    |

#### User Spectra

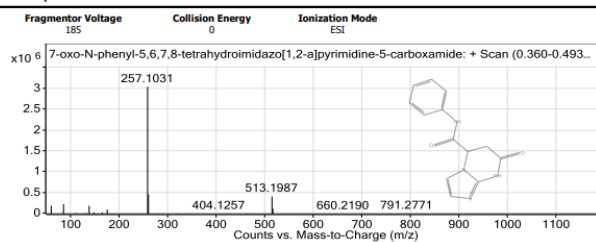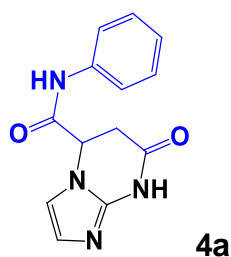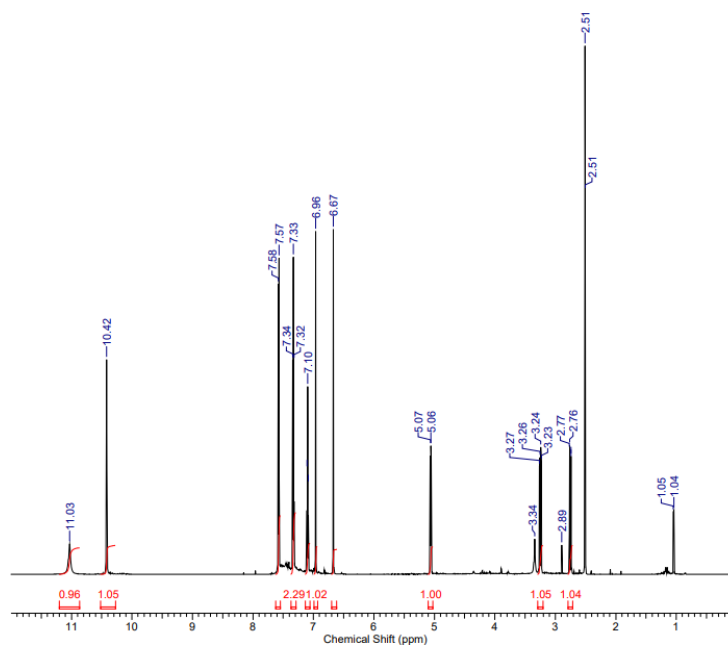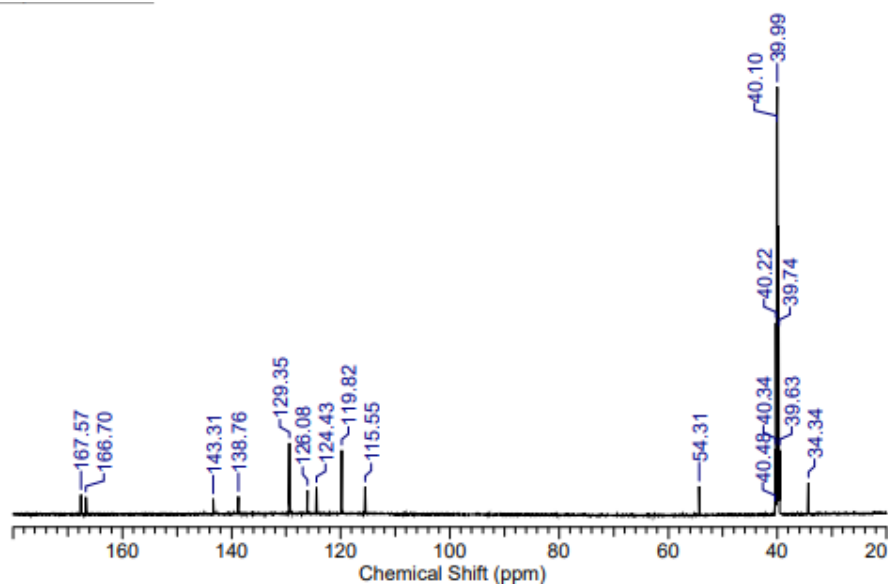

User Chromatograms

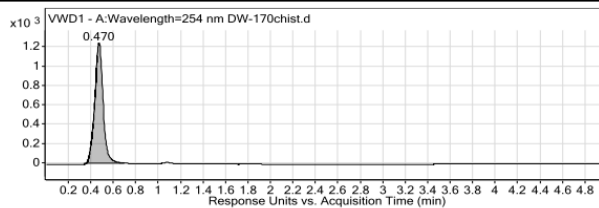

Integration Peak List

| Peak | Start | RT   | End   | Height  | Area    | Area % |
|------|-------|------|-------|---------|---------|--------|
| 1    | 0.34  | 0.47 | 0.693 | 1246.58 | 6590.52 | 100    |

User Spectra

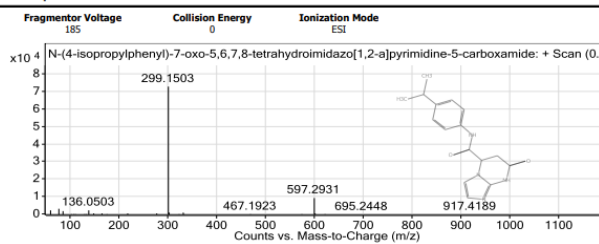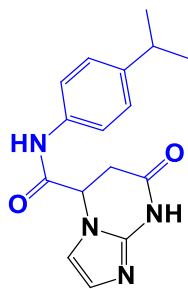

4b

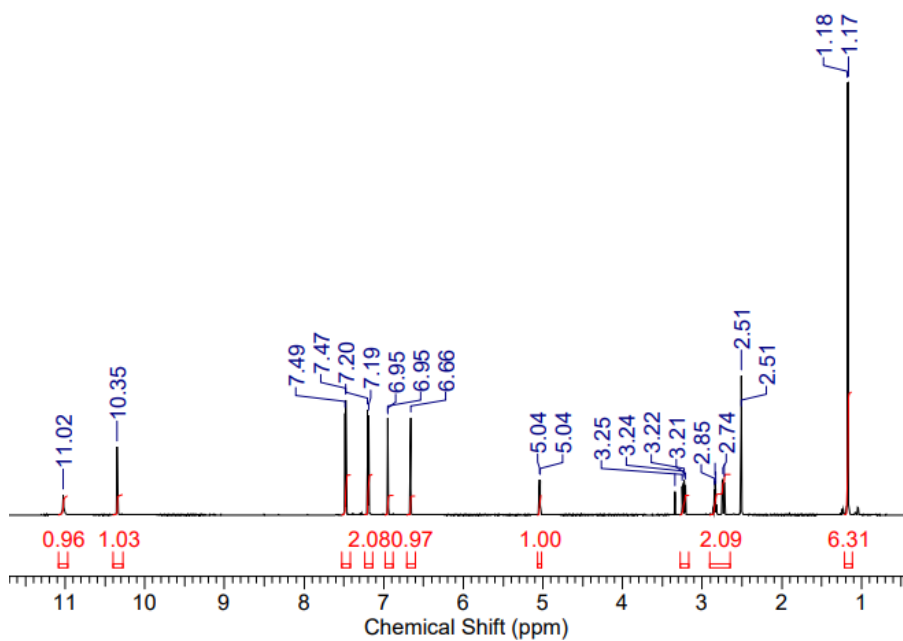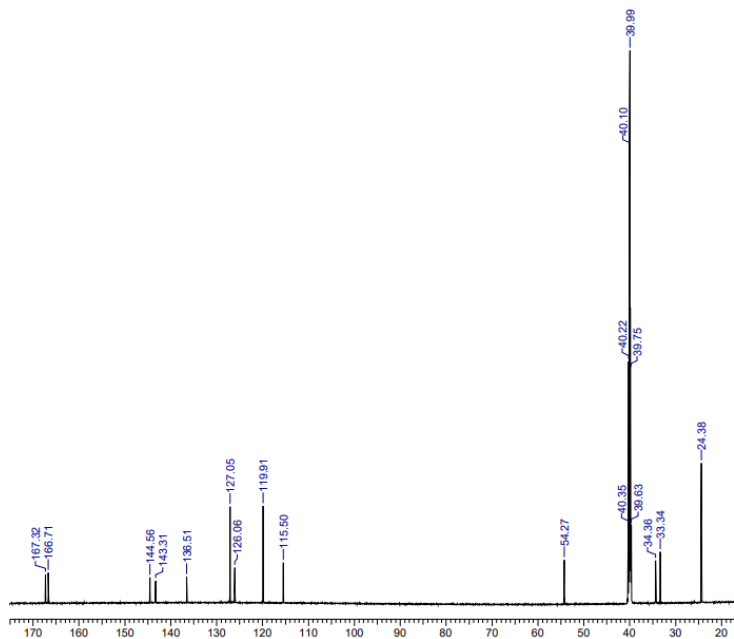

User Chromatograms

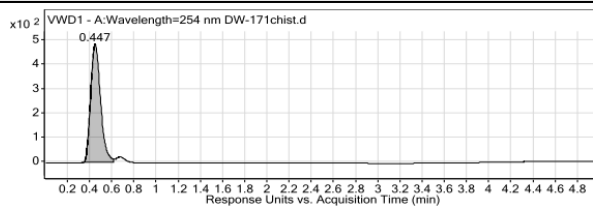

Integration Peak List

| Peak | Start | RT    | End   | Height | Area    | Area % |
|------|-------|-------|-------|--------|---------|--------|
| 1    | 0.326 | 0.447 | 0.617 | 487.57 | 3046.41 | 100    |

User Spectra

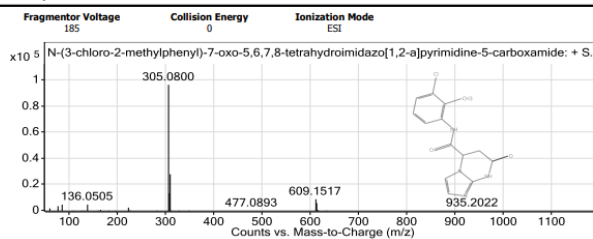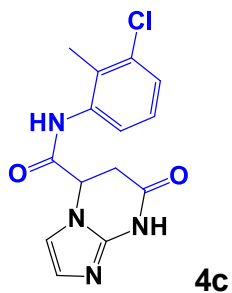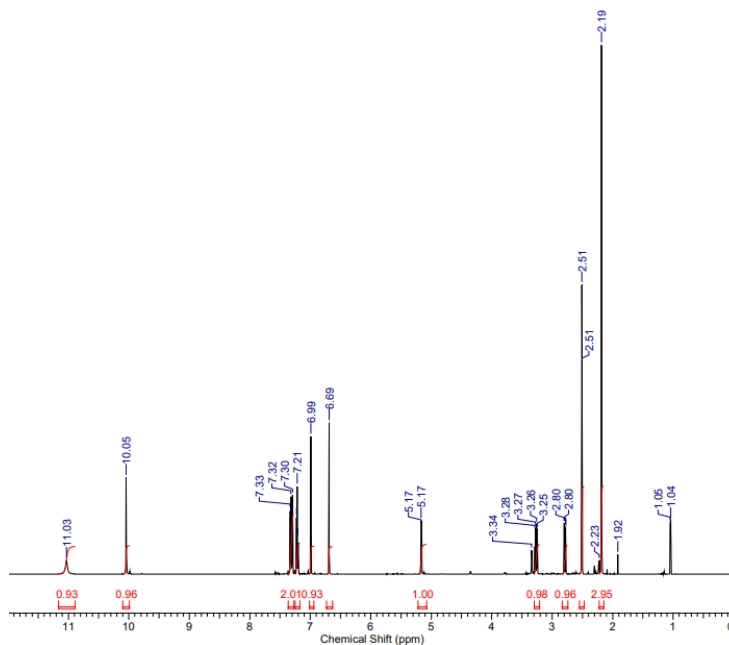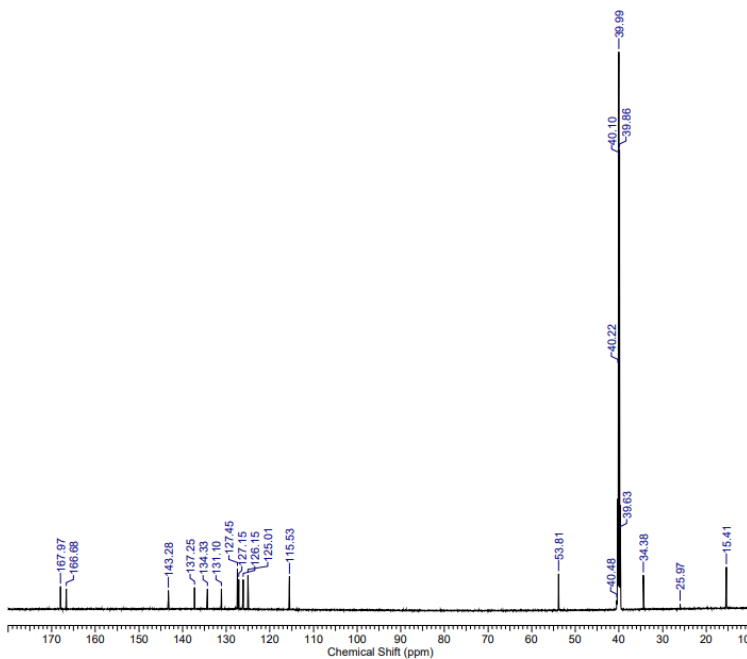

### User Chromatograms

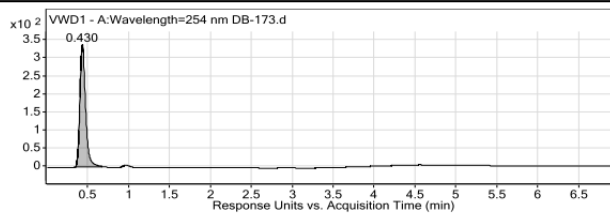

### Integration Peak List

| Peak | Start | RT   | End   | Height | Area    | Area % |
|------|-------|------|-------|--------|---------|--------|
| 1    | 0.331 | 0.43 | 0.673 | 340.36 | 1692.22 | 100    |

### User Spectra

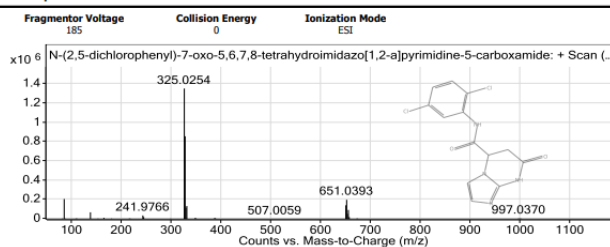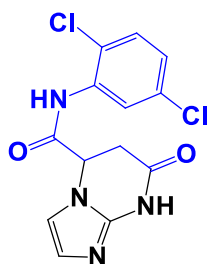

4d

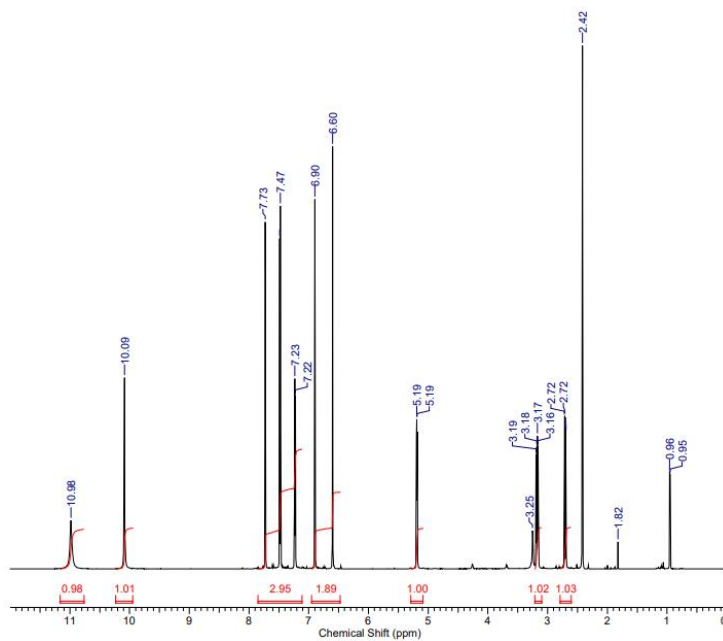



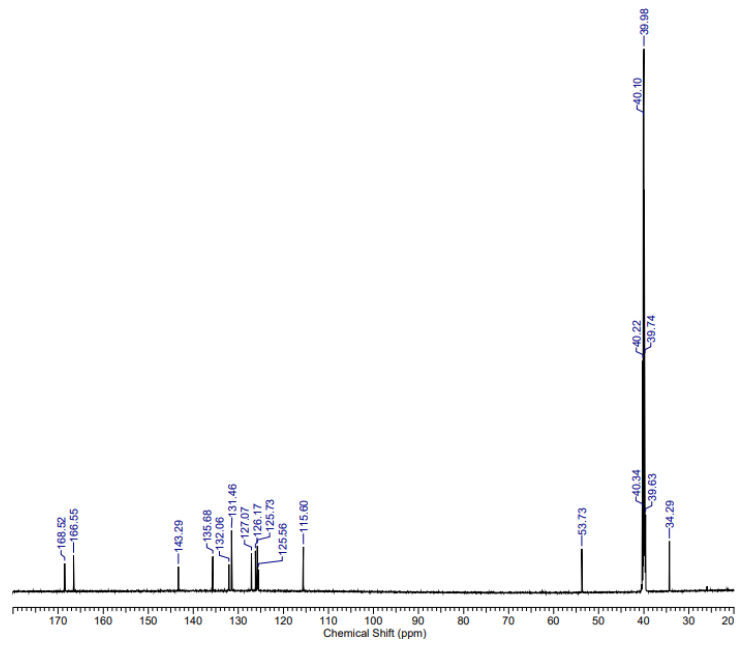

FZ2918.028.001.2rr NOESY-1.esp

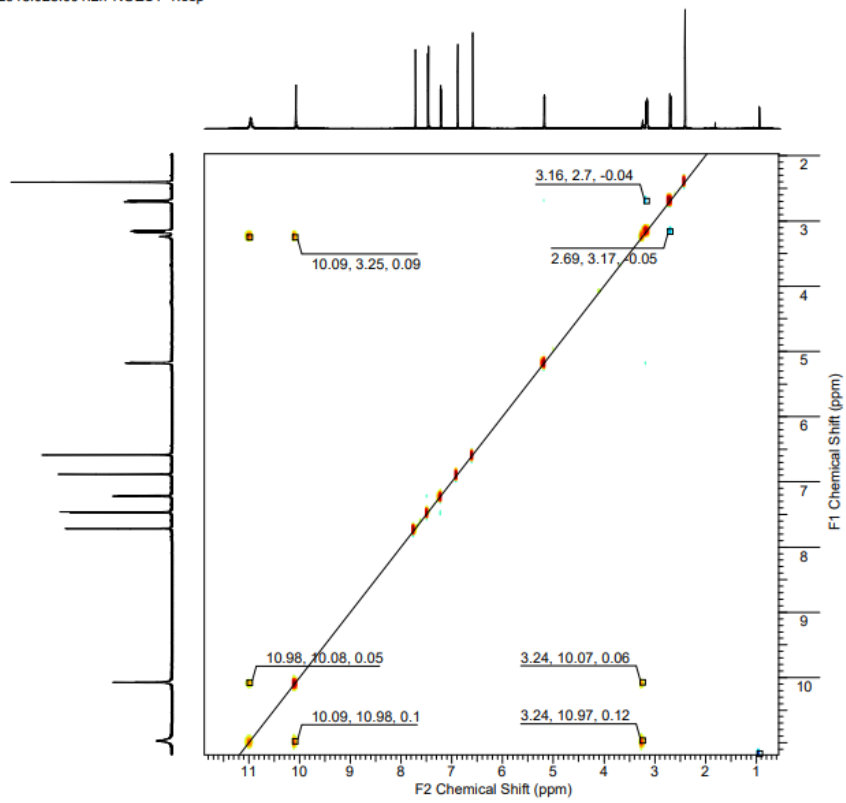

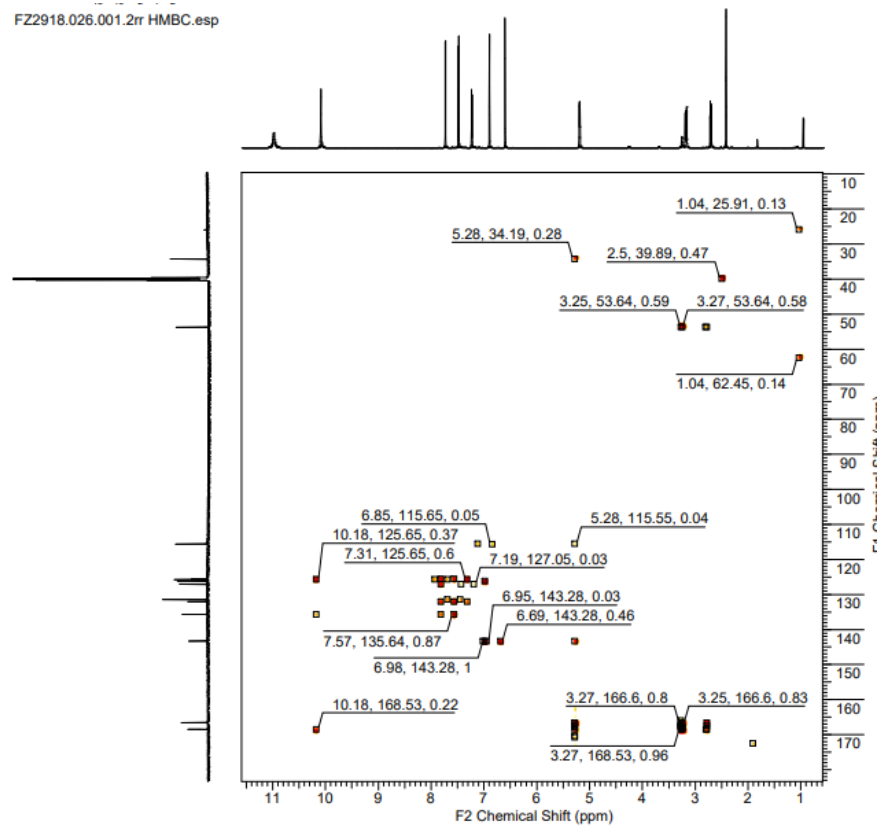

User Chromatograms

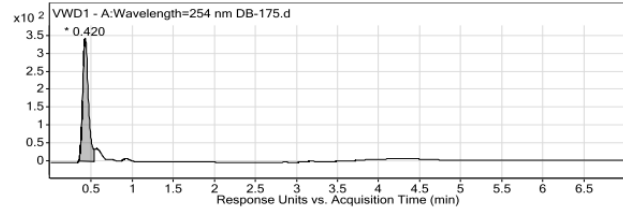

Integration Peak List

| Peak | Start | RT   | End   | Height | Area    | Area % |
|------|-------|------|-------|--------|---------|--------|
| 1    | 0.334 | 0.42 | 0.537 | 345.6  | 1711.22 | 100    |

User Spectra

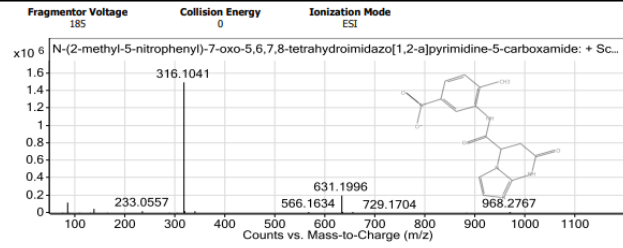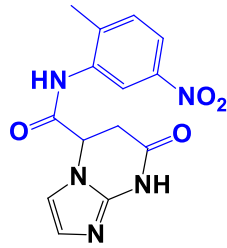

4e

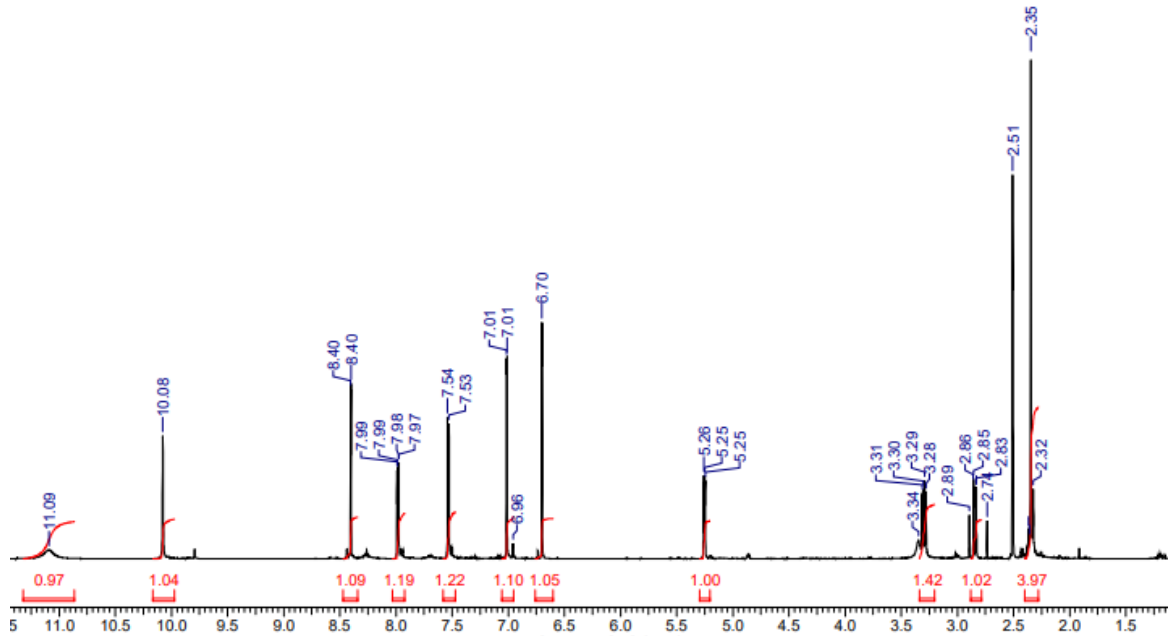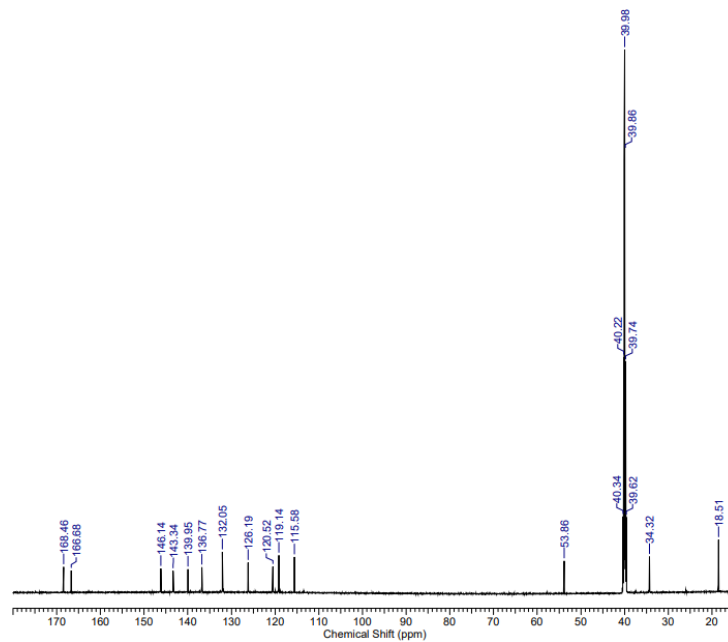

User Chromatograms

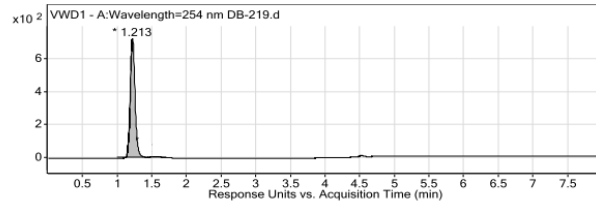

Integration Peak List

| Peak | Start | RT    | End   | Height | Area    | Area % |
|------|-------|-------|-------|--------|---------|--------|
| 1    | 0.997 | 1.213 | 1.443 | 725.62 | 3509.57 | 100    |

User Spectra

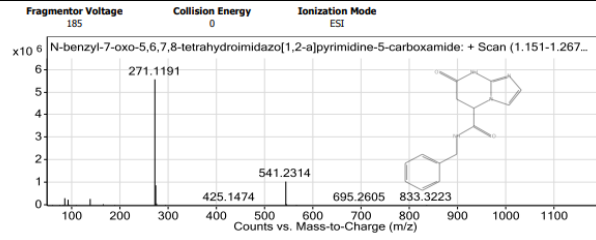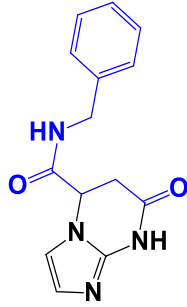

4f

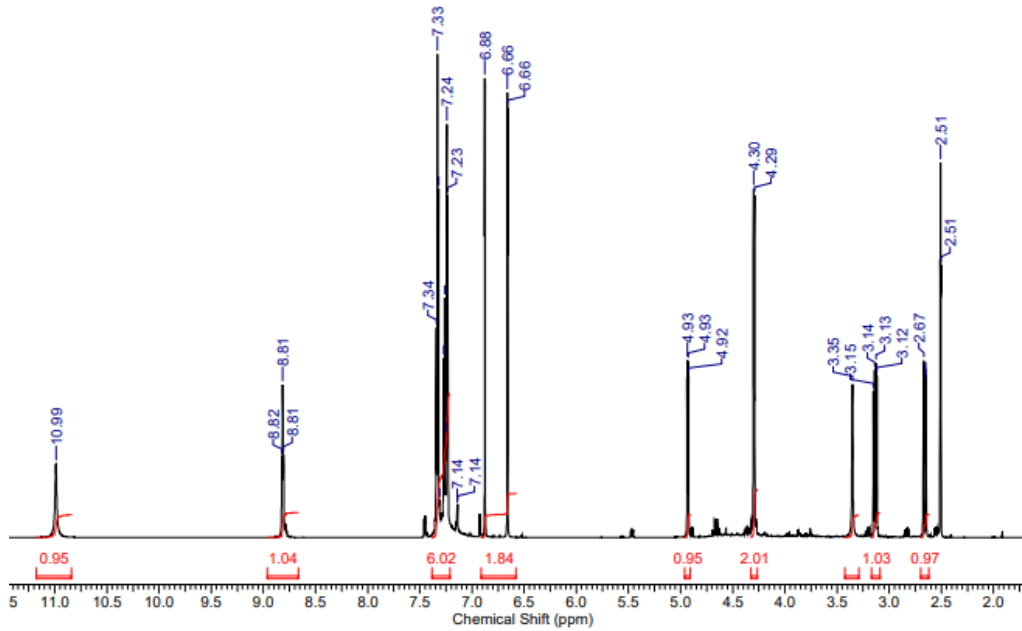

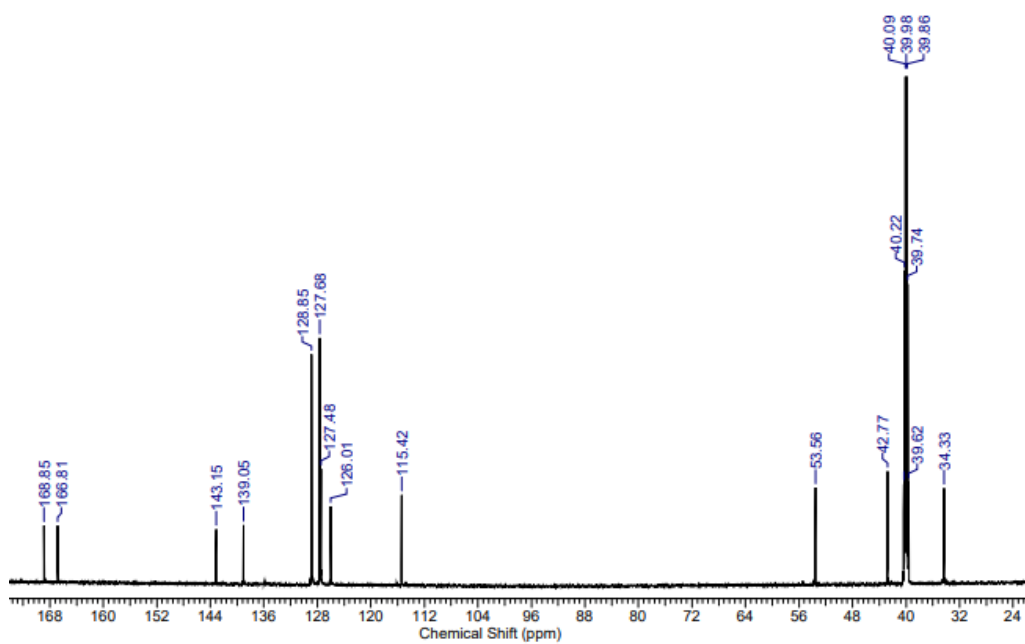

User Chromatograms

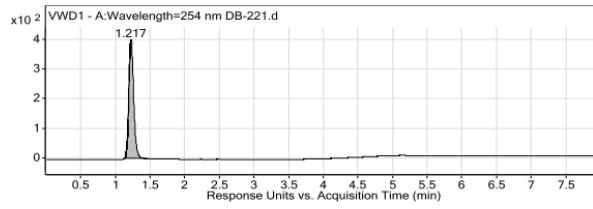

Integration Peak List

| Peak | Start | RT    | End  | Height | Area    | Area % |
|------|-------|-------|------|--------|---------|--------|
| 1    | 1.113 | 1.217 | 1.46 | 400.74 | 1968.15 | 100    |

User Spectra

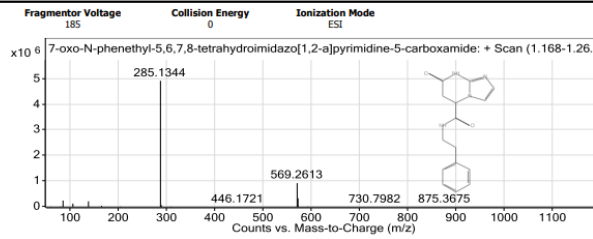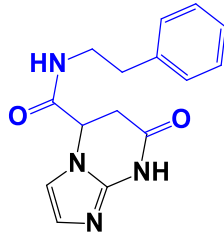

4g

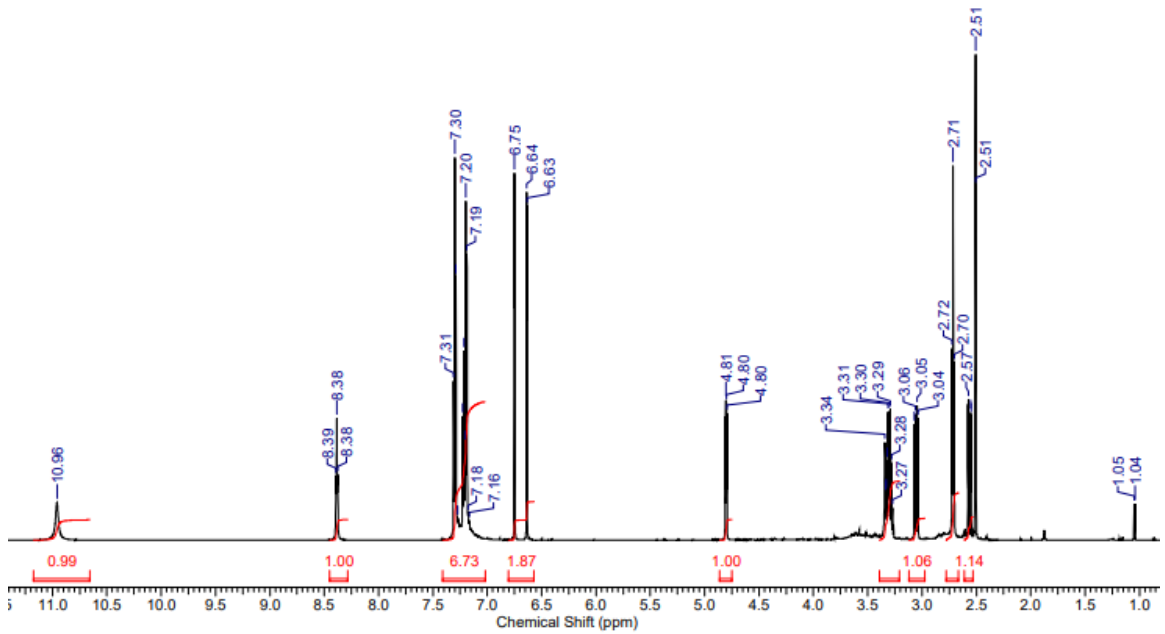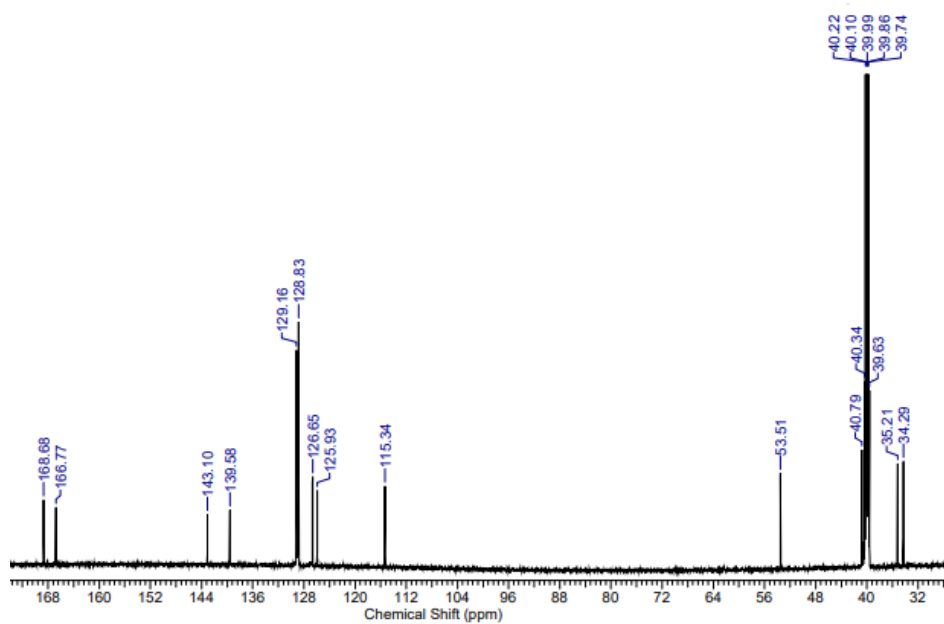

User Chromatograms

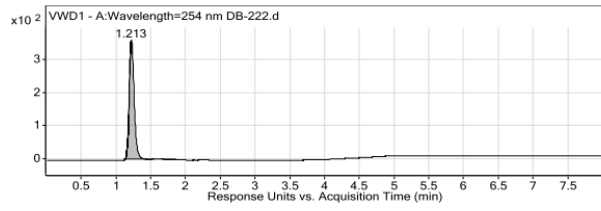

Integration Peak List

| Peak | Start | RT    | End   | Height | Area    | Area % |
|------|-------|-------|-------|--------|---------|--------|
| 1    | 1.112 | 1.213 | 1.477 | 359.67 | 1787.12 | 100    |

User Spectra

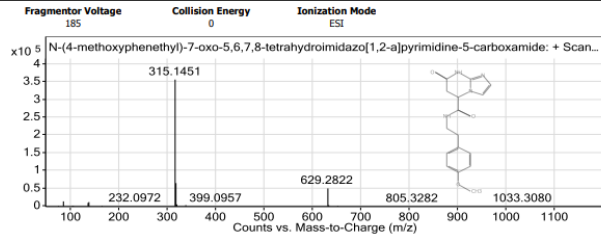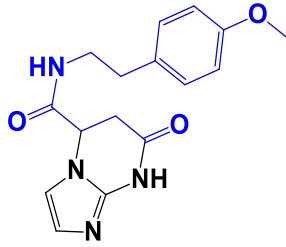

4h

FZ3548\_010001R.ESP

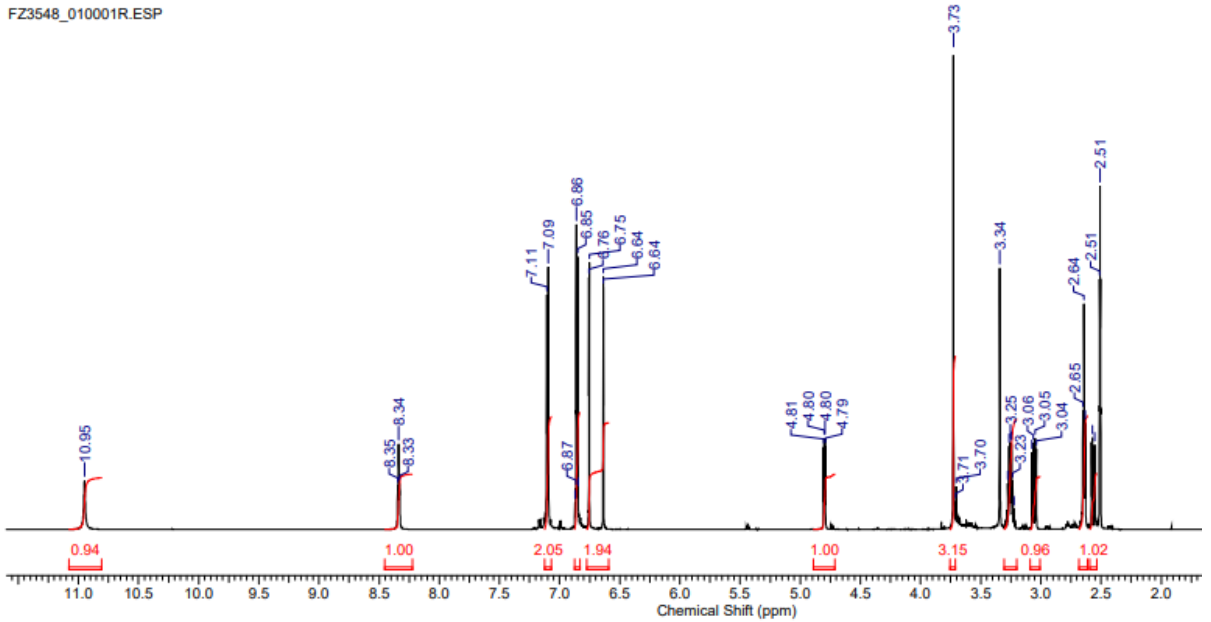

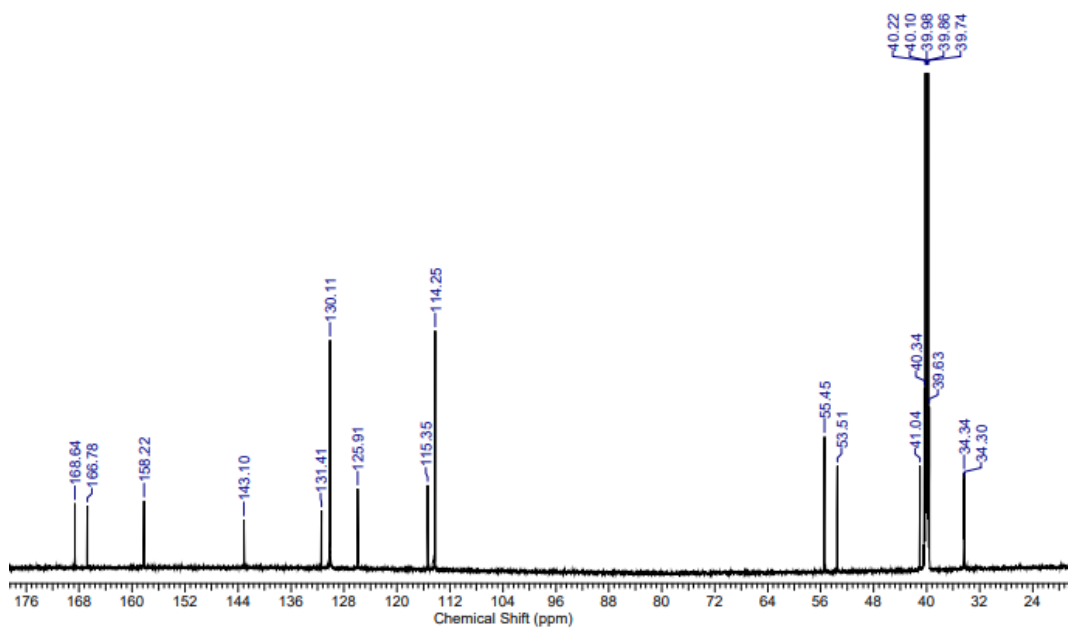



User Chromatograms

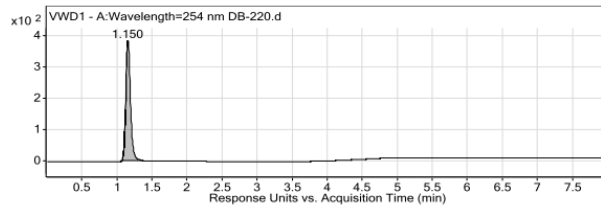

Integration Peak List

| Peak | Start | RT   | End   | Height | Area    | Area % |
|------|-------|------|-------|--------|---------|--------|
| 1    | 1.05  | 1.15 | 1.373 | 386.15 | 1809.65 | 100    |

User Spectra

Fragmentor Voltage 185 Collision Energy 0 Ionization Mode ESI

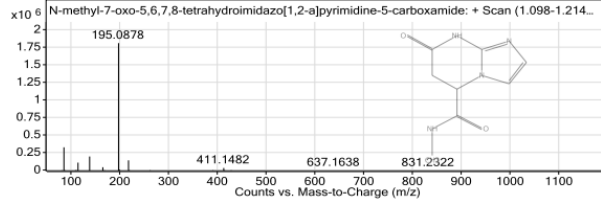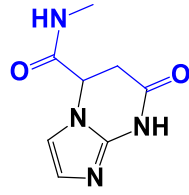

4i

FZ3546\_010001r.ep

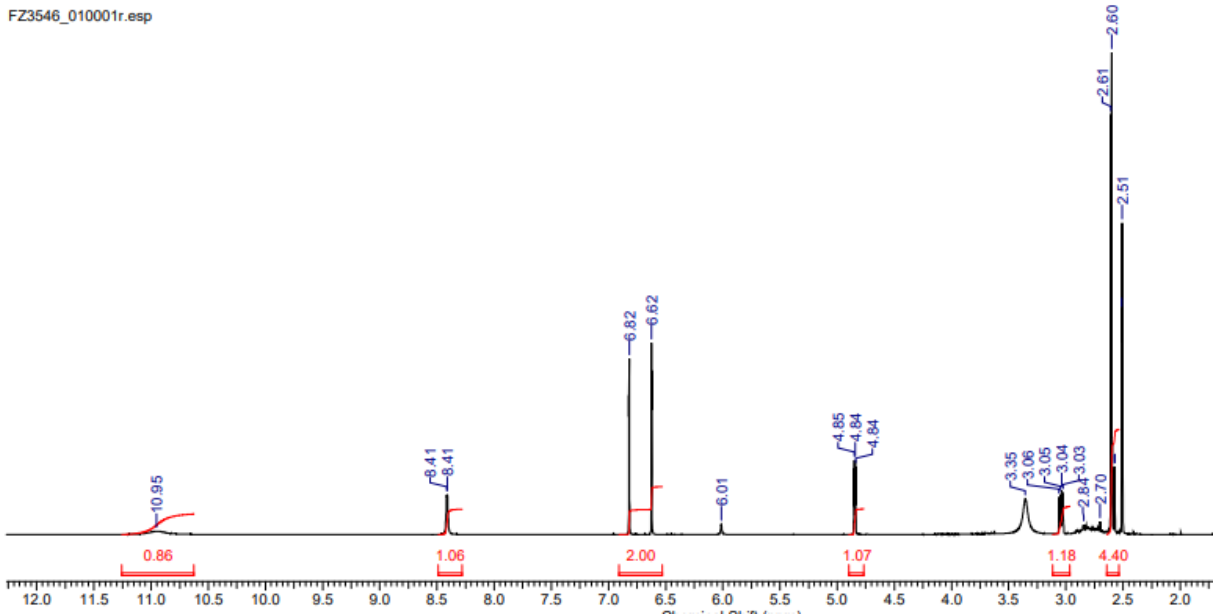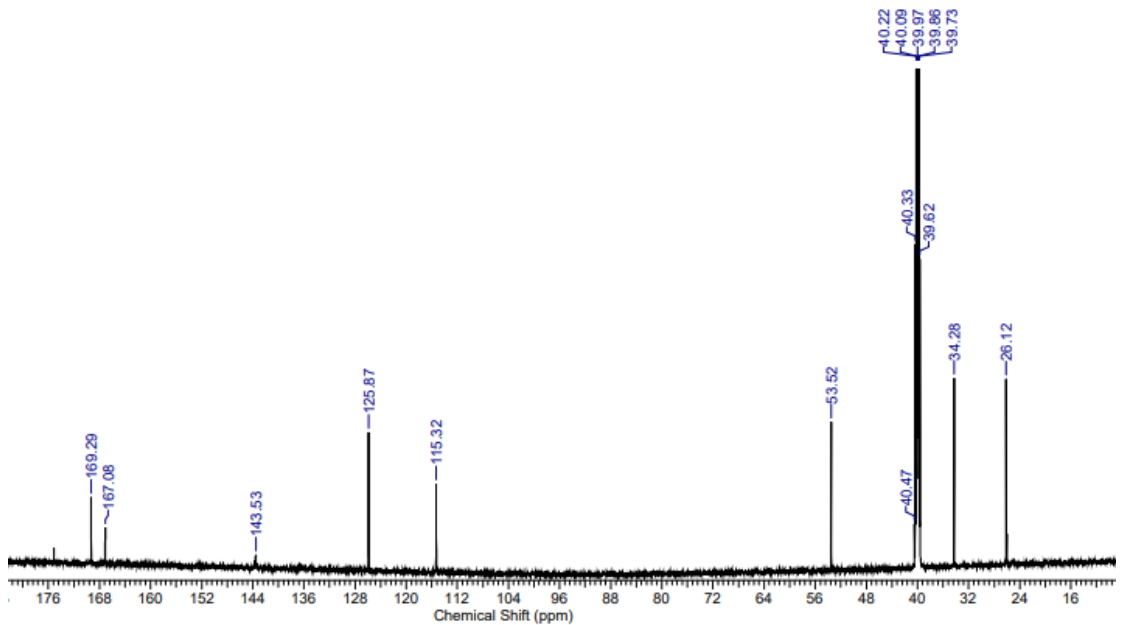

User Chromatograms

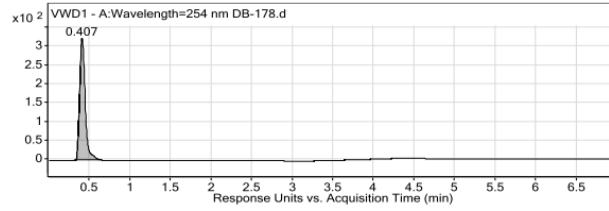

Integration Peak List

| Peak | Start | RT    | End  | Height | Area    | Area % |
|------|-------|-------|------|--------|---------|--------|
| 1    | 0.313 | 0.407 | 0.65 | 323.97 | 1551.84 | 100    |

User Spectra

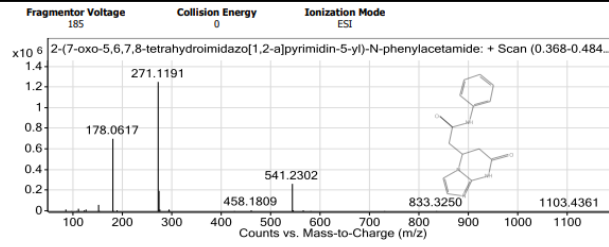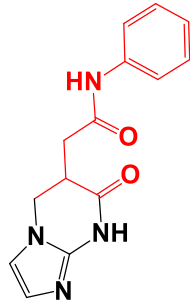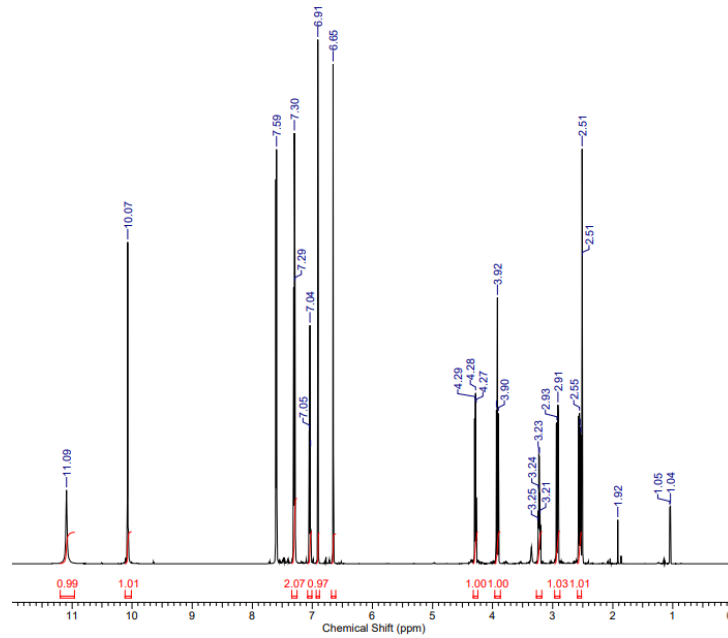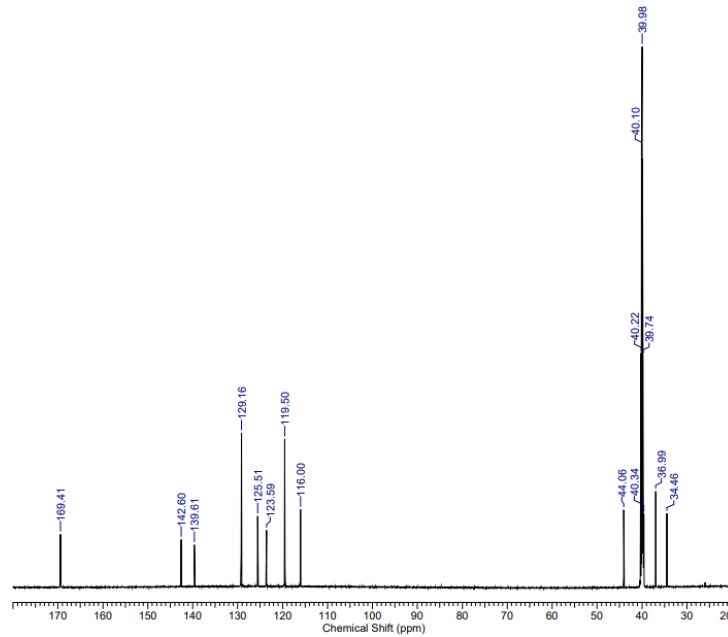

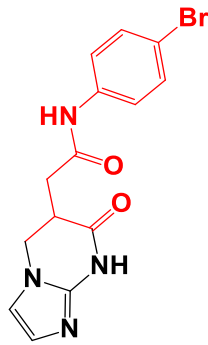

5b

User Chromatograms

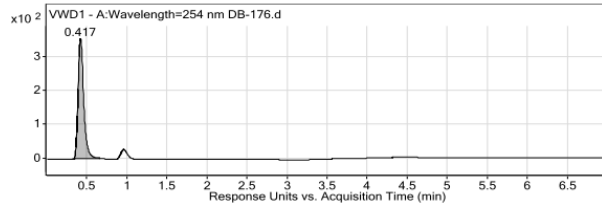

Integration Peak List

| Peak | Start | RT    | End  | Height | Area    | Area % |
|------|-------|-------|------|--------|---------|--------|
| 1    | 0.321 | 0.417 | 0.66 | 356.73 | 1779.92 | 100    |

User Spectra

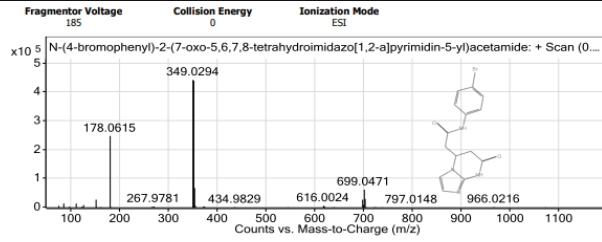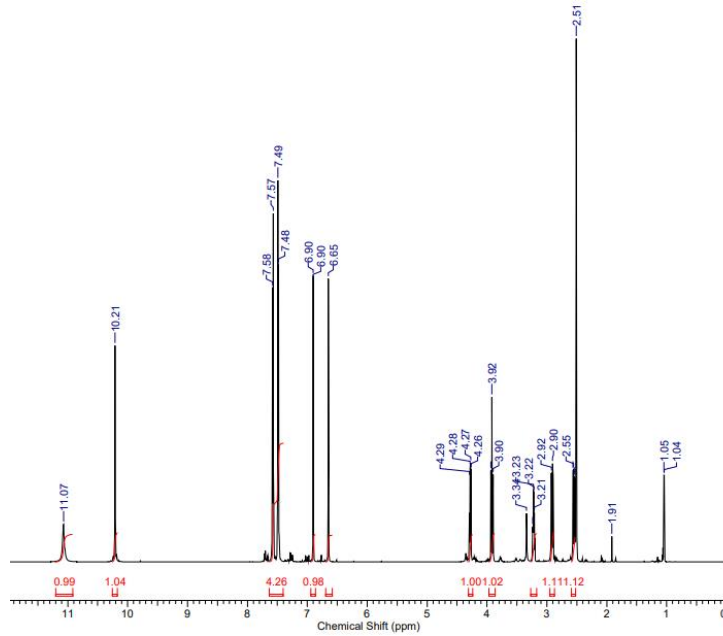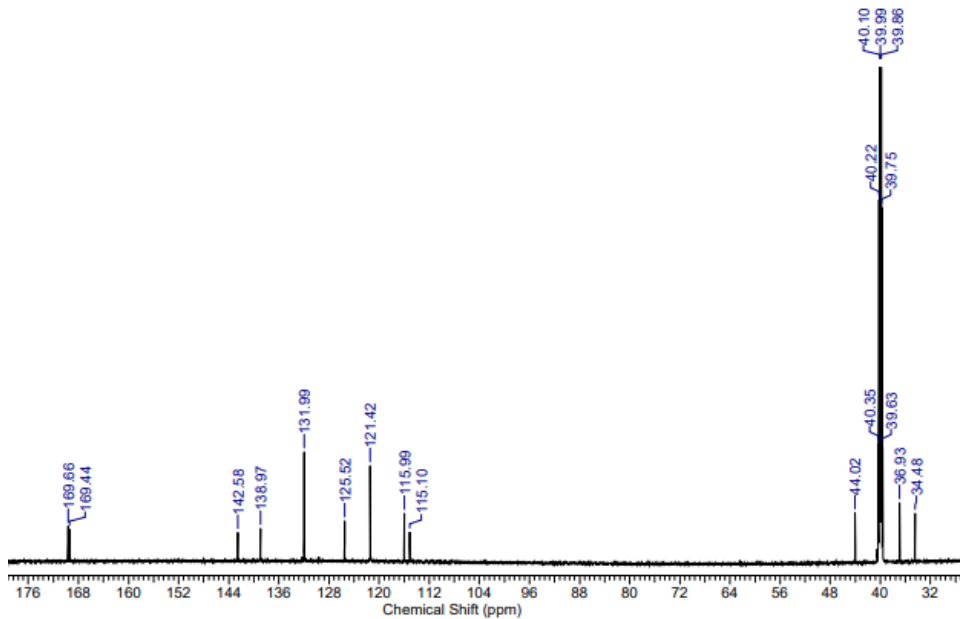

User Chromatograms

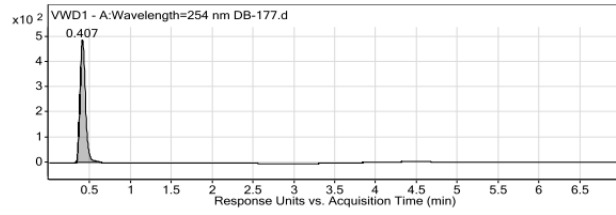

Integration Peak List

| Peak | Start | RT    | End  | Height | Area    | Area % |
|------|-------|-------|------|--------|---------|--------|
| 1    | 0.313 | 0.407 | 0.65 | 488.94 | 2298.27 | 100    |

User Spectra

Fragmentor Voltage: 185  
Collision Energy: 0  
Ionization Mode: ESI

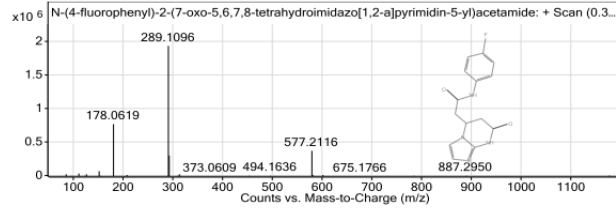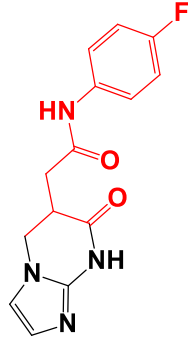

5c

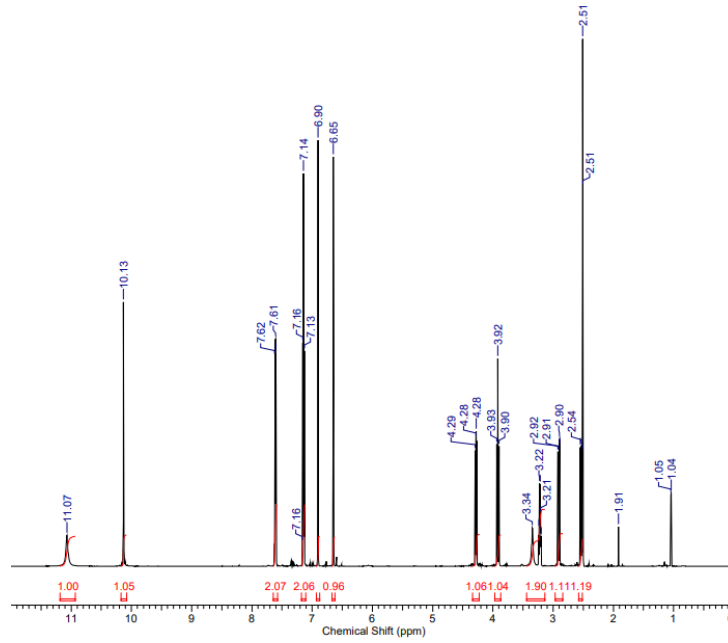

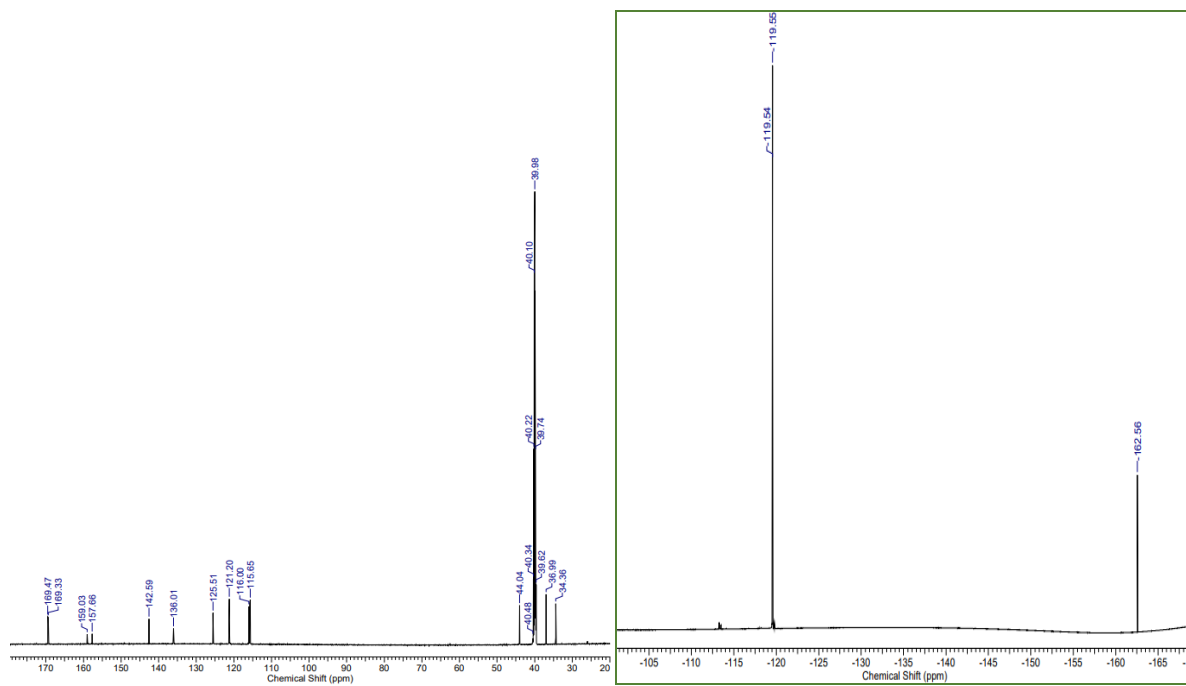

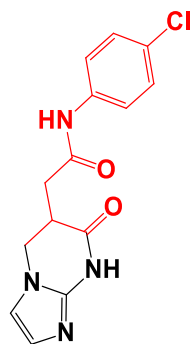

5d

User Chromatograms

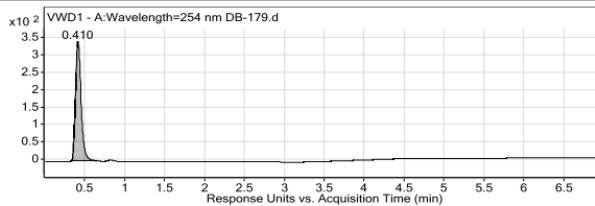

Integration Peak List

| Peak | Start | RT   | End   | Height | Area    | Area % |
|------|-------|------|-------|--------|---------|--------|
| 1    | 0.314 | 0.41 | 0.653 | 343.71 | 1702.41 | 100    |

User Spectra

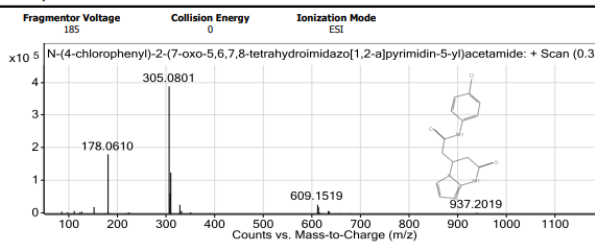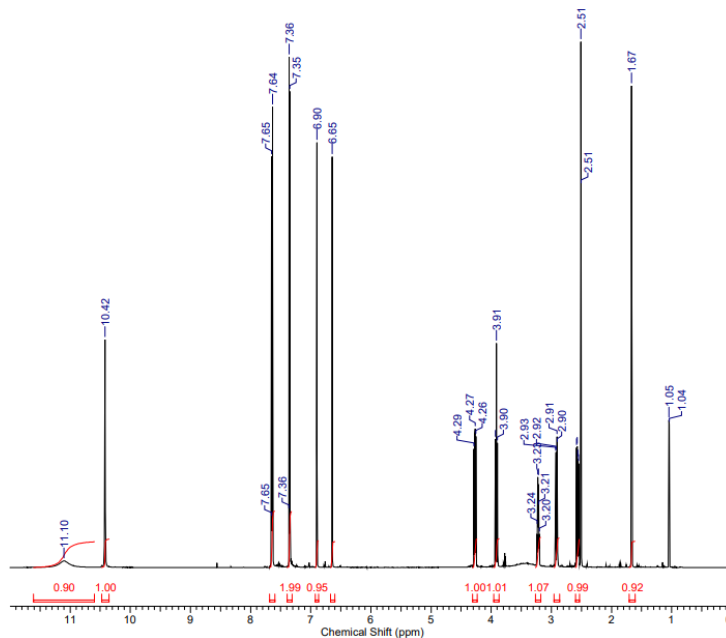

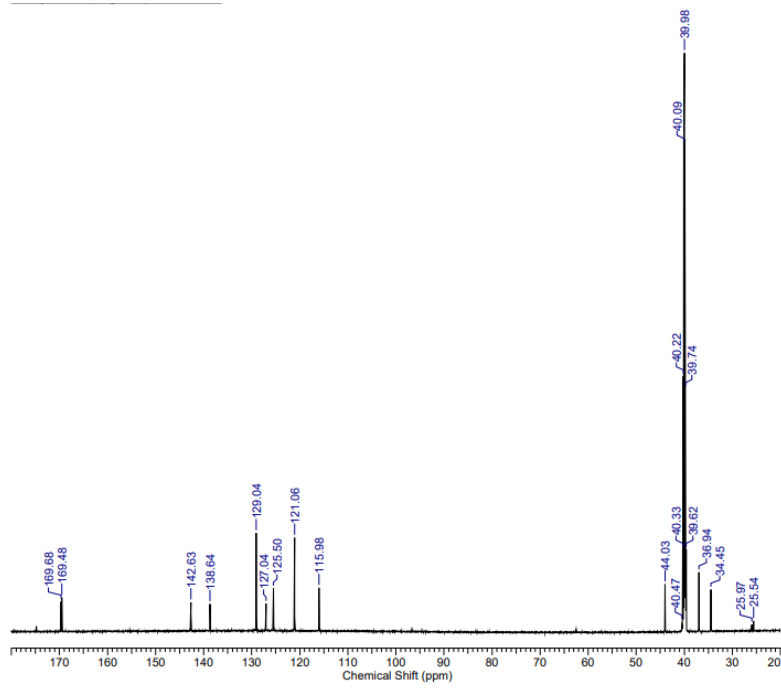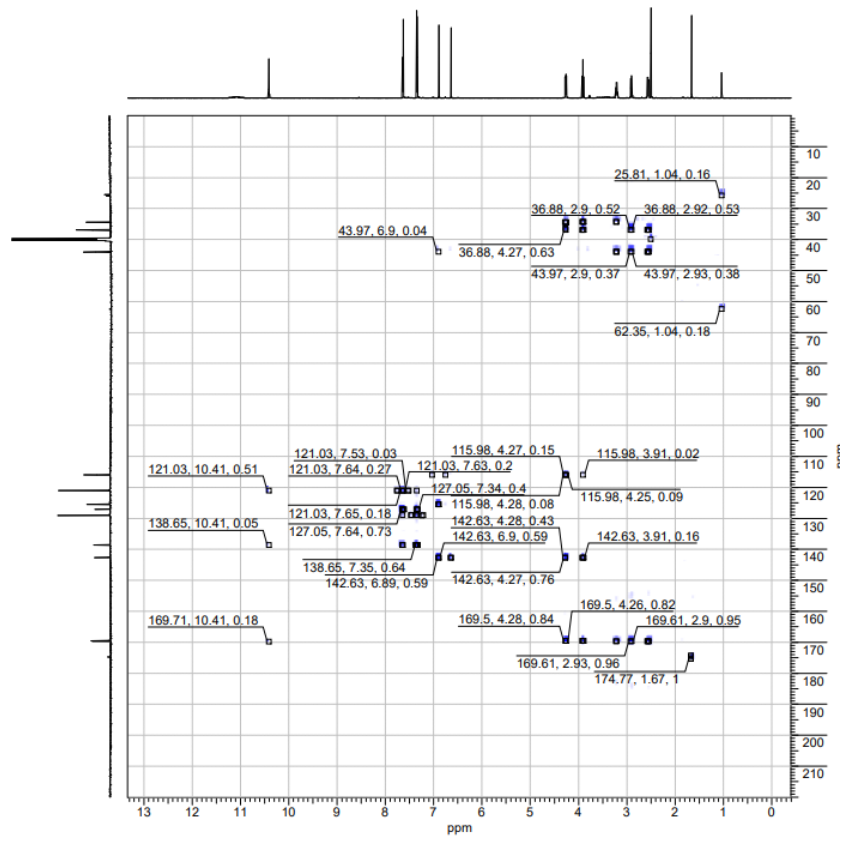

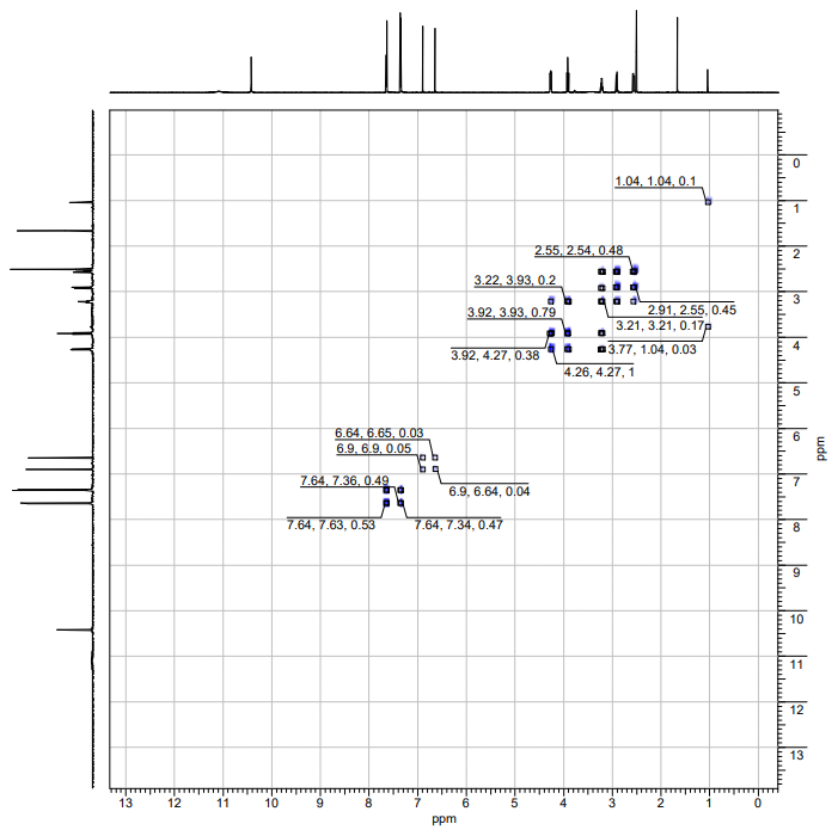



User Chromatograms

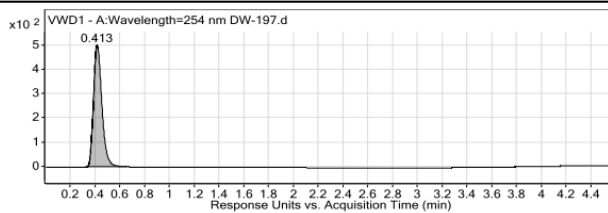

Integration Peak List

| Peak | Start | RT    | End   | Height | Area    | Area % |
|------|-------|-------|-------|--------|---------|--------|
| 1    | 0.32  | 0.413 | 0.657 | 506.63 | 2382.89 | 100    |

User Spectra

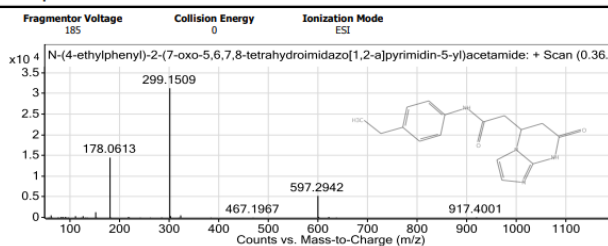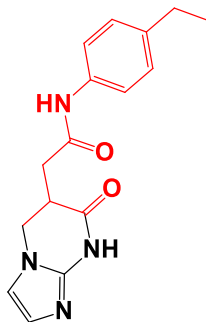

5e

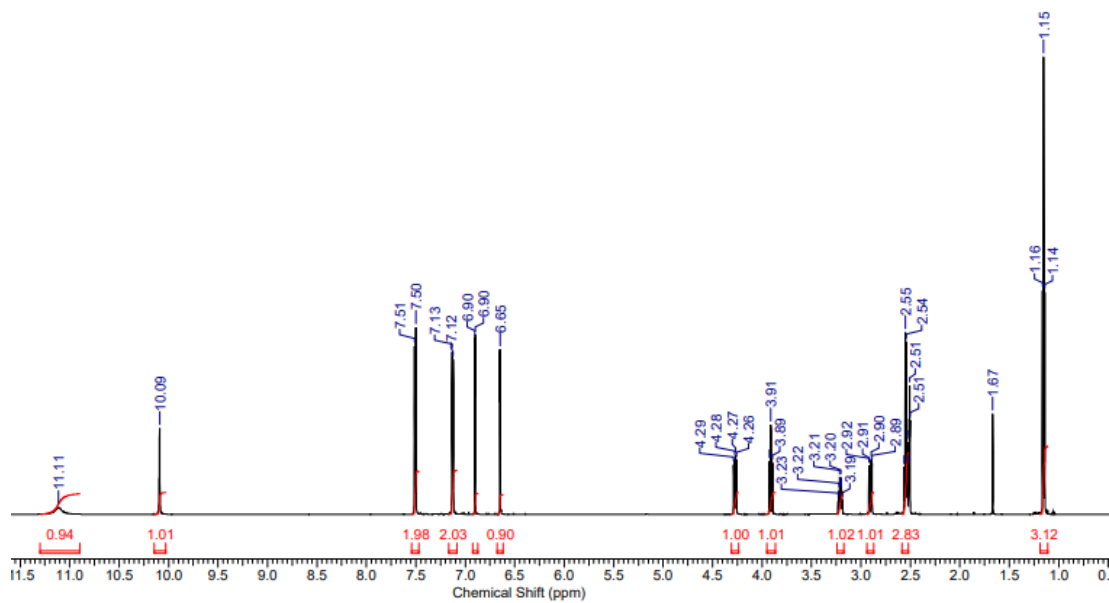

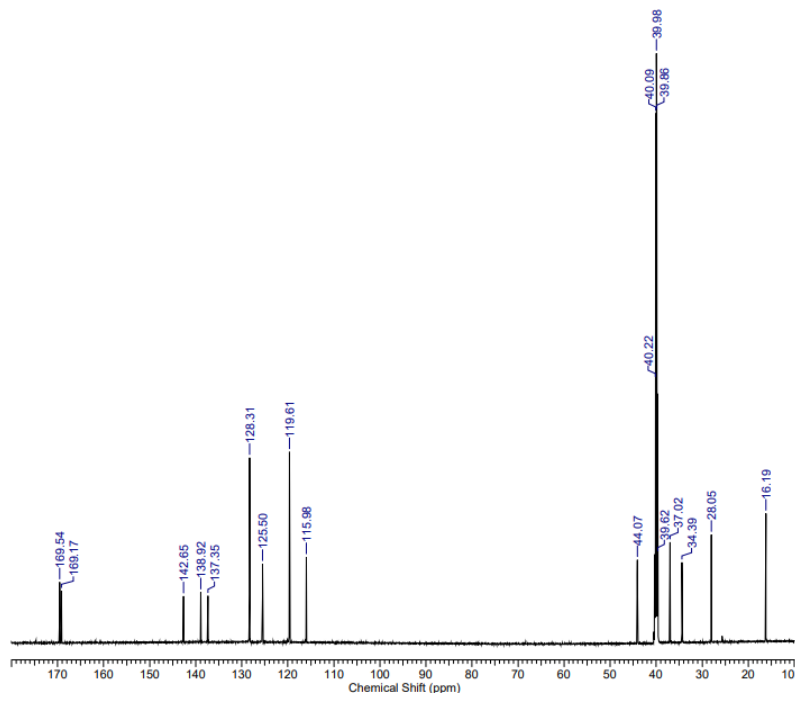

Supplement: Additional file 1 [file 1860-5397-20-236-S1.pdf]
